# Supplementary material for: Establishing the Link between X-Chromosome Aberrations and TP53 Status, with Breast Cancer Patient Outcomes
Source: MDPI journal article supplement (doi:10.3390/cells12182245), 2023-09-11
Supplement: s1 [file s1]

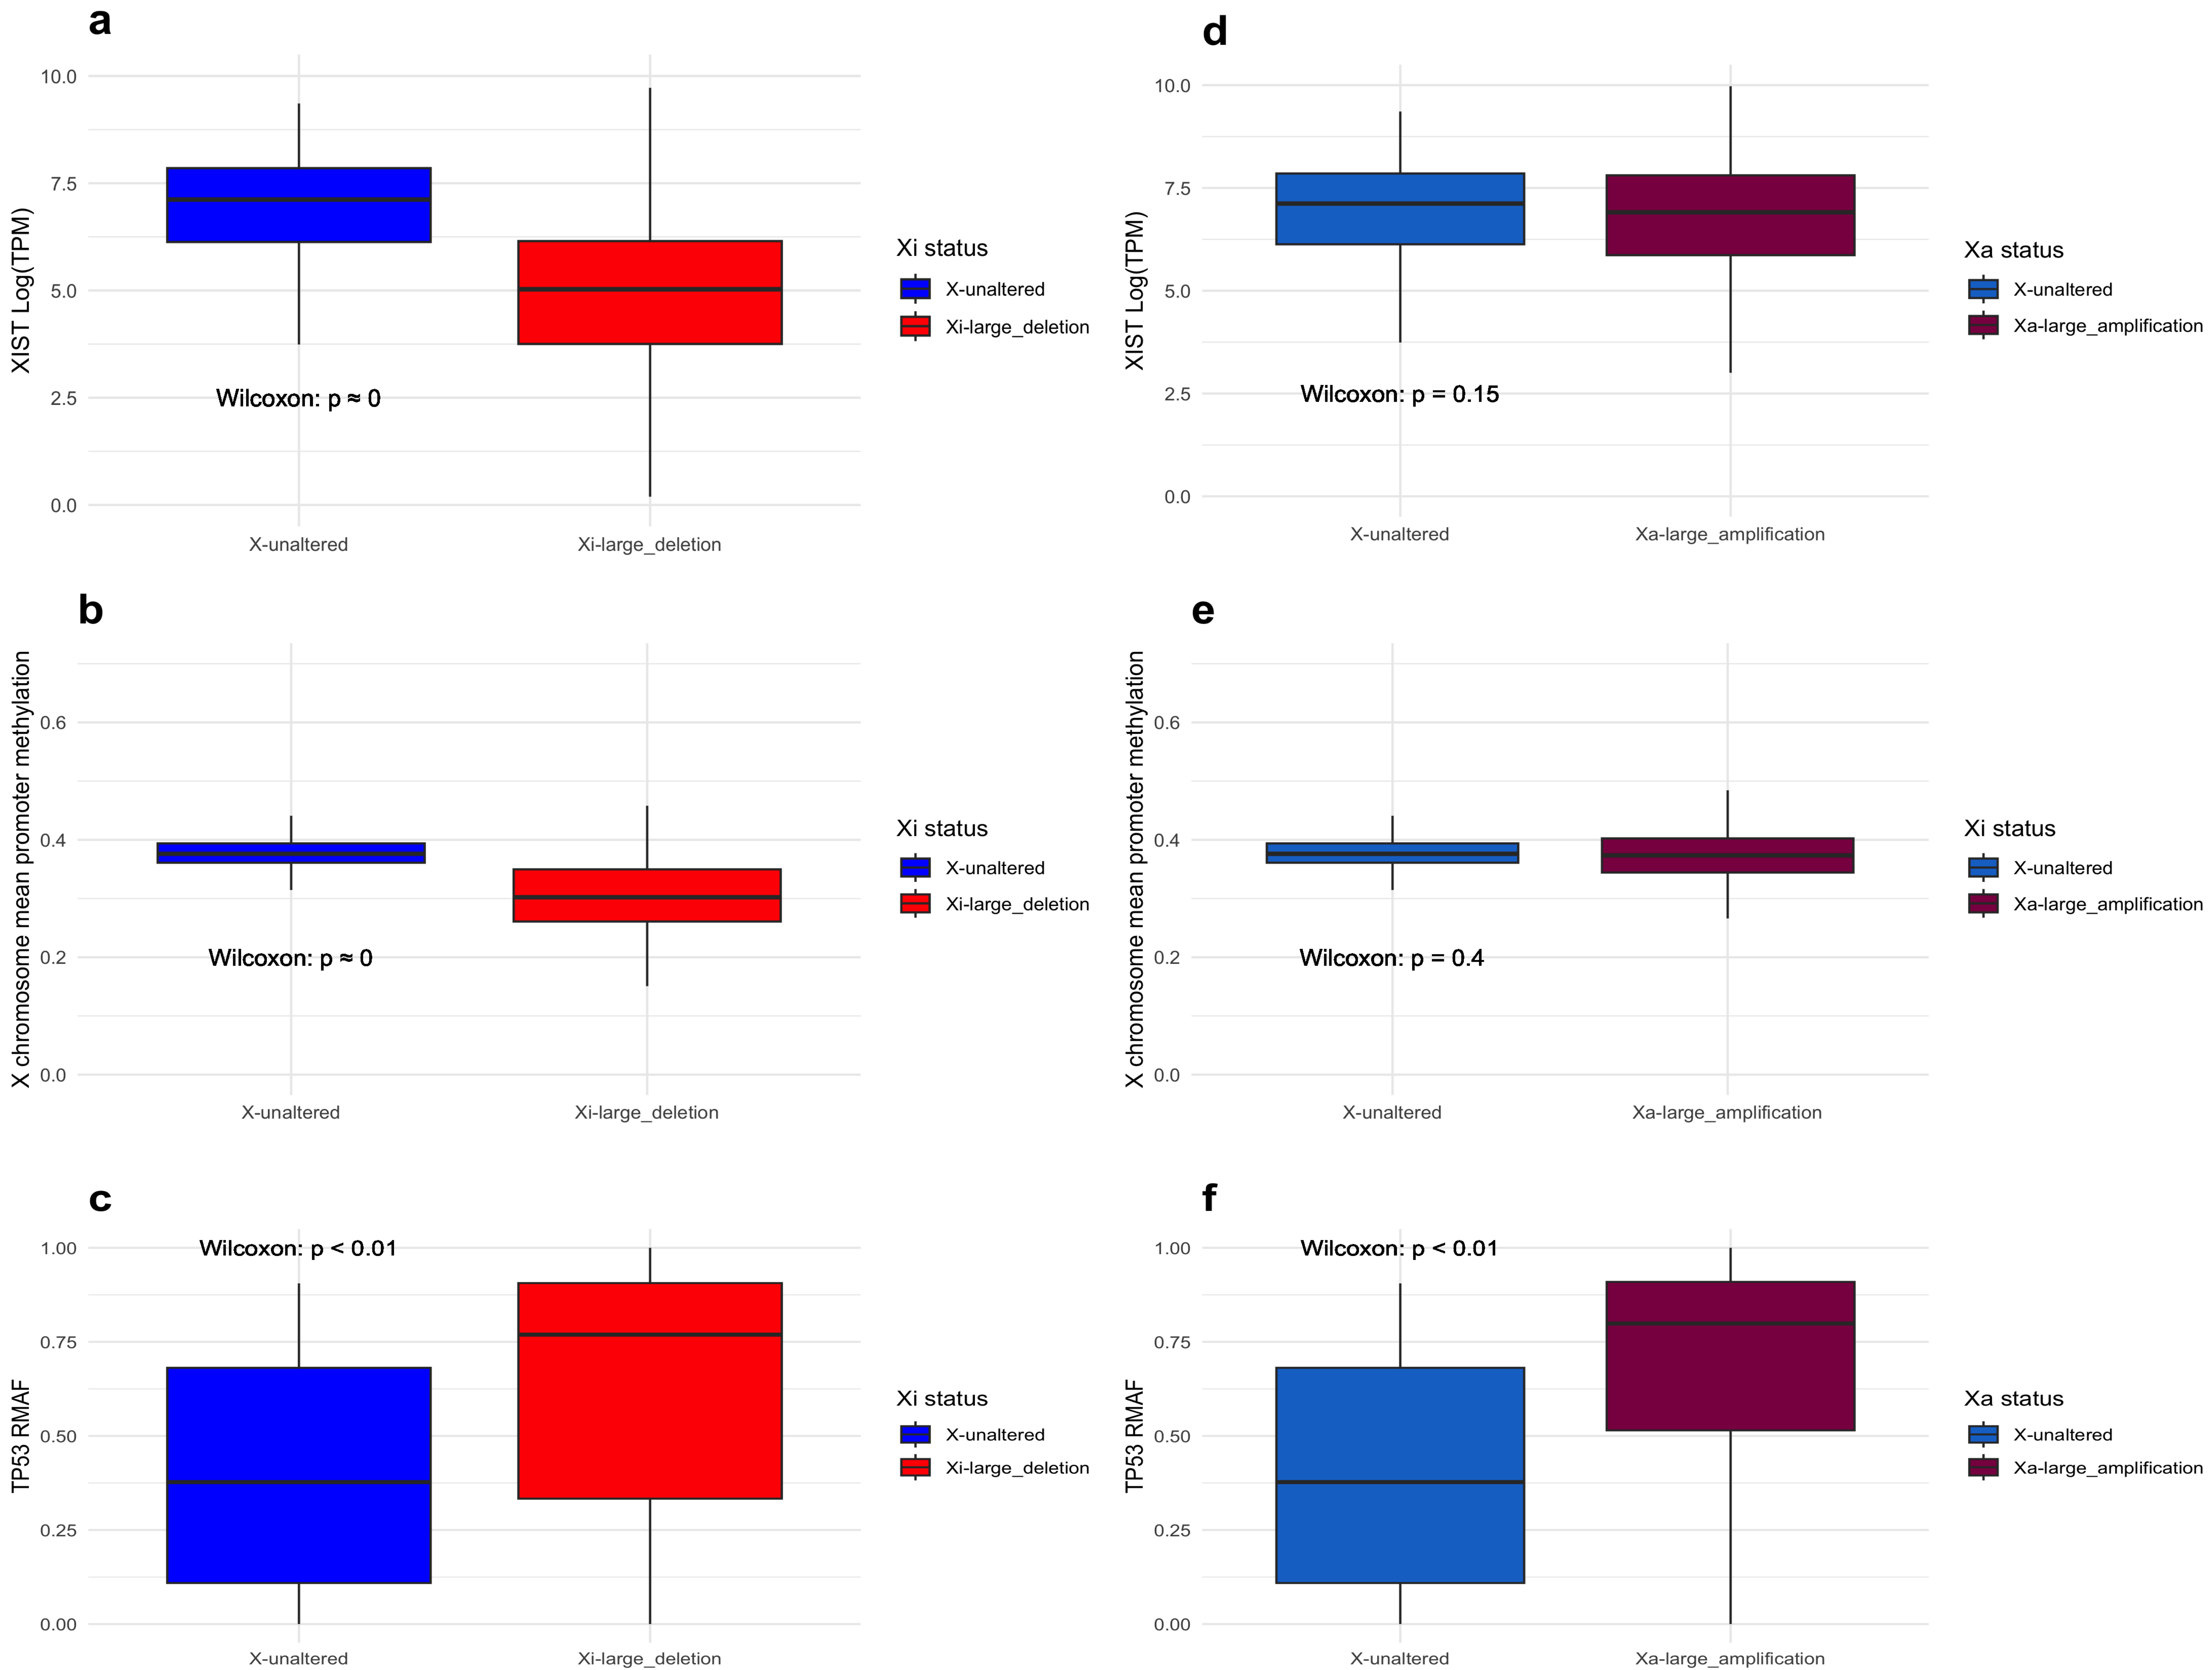

**Supplementary Figure S2: Exploring *XIST* Expression, X Mean promoter methylation and *TP53* RMAF between X aberration groups in BRCA-TCGA.**
