# Supplementary material for: Establishing the Link between X-Chromosome Aberrations and TP53 Status, with Breast Cancer Patient Outcomes
Source: Cells. 2023 Sep 11;12(18):2245. doi: 10.3390/cells12182245 (PMC10526523; doi:10.3390/cells12182245)
Supplement: Supplementary file 1 [file cells-12-02245-s001.zip]

Archive with 10 entries (10 files):
- Diagram S1.pdf
- Figure S1.pdf
- Figure S2.pdf
- Figure S3.pdf
- Figure S4.pdf
- Table S1.xls
- Table S2.xls
- Table S3.csv
- Table S4.csv
- Table S5.xlsx
