# Supplementary material for: Establishing the Link between X-Chromosome Aberrations and TP53 Status, with Breast Cancer Patient Outcomes
Source: Cells. 2023 Sep 11;12(18):2245. doi: 10.3390/cells12182245 (PMC10526523; doi:10.3390/cells12182245)
Supplement: Supplementary file 1 [file cells-12-02245-s001.zip › Table S1.xls]

## Sheet: Supp Table 1
logFC	AveExpr	t	P.Value	adj.P.Val	B	Xi Del symbol	Chromosome	Chrm	Role	Reference	Name	Entrez_GeneId	Genome_Location	Tier	Hallmark	Chr_Band	Somatic	Germline	Tumour_Types(Somatic)	Tumour_Types(Germline)	Cancer_Syndrome	Tissue_Type	Molecular_Genetics	Role_in_Cancer	Mutation_Types	Translocation_Partner	Other_Germline_Mut	Other_Syndrome	Synonyms	chr	start	end
-0.45282	5.33923	-8.74357	9.34e-18	2.04e-15	29.6103	AKAP17A	Xp22.33 and Yp11.32	X
-0.575505	0.484629	-4.53893	6.34e-06	7.29e-05	3.26016	ASMTL-AS1	Xp22.33 and Yp11.32	X
-0.364057	5.27632	-5.26905	1.68e-07	3.44e-06	6.71891	GTPBP6	Xp22.33 and Yp11.32	X
-0.641802	-0.604325	-5.68429	1.72e-08	5.37e-07	8.9031	LINC00106	Xp22.33 and Yp11.32	X
-0.526733	-0.621192	-5.38691	8.93e-08	2.25e-06	7.32298	LINC00685	Xp22.33 and Yp11.32	X
-0.221607	4.02215	-2.88129	0.00404469	0.0141889	-2.73812	PLCXD1	Xp22.33 and Yp11.32	X
-0.257056	2.17504	-4.06561	5.16e-05	0.000389435	1.28215	CD99P1	Xp22.33 and Yp11.31	X
-0.188619	4.64337	-3.50716	0.000472929	0.00246223	-0.780227	DHRSX	Xp22.33 and Yp11.2	X
-0.248629	6.25225	-5.03327	5.71e-07	1.01e-05	5.54839	ZBED1	Xp22.33 and Yp11	X							a
-0.333739	8.51139	-4.50958	7.26e-06	7.94e-05	3.1314	SLC25A6	Xp22.32 and Yp11.3	X
-0.170186	4.253	-2.94323	0.00332276	0.0121773	-2.56115	PUDP	Xp22.32	X
-0.277276	4.53648	-3.07716	0.00214641	0.00858563	-2.16582	STS	Xp22.32	X
-0.417818	3.16095	-5.98745	2.96e-09	1.3e-07	10.5957	IL3RA	Xp22.3 and Yp13.3	X
-0.285755	5.06615	-4.18062	3.16e-05	0.000284012	1.74345	ASMTL	Xp22.3 and Yp11.3	X
-0.310069	3.54533	-4.08706	4.72e-05	0.000375595	1.36723	PPP2R3B	Xp22.3 and Yp11.3	X
-0.339607	6.85747	-4.68012	3.26e-06	3.96e-05	3.89064	ARSD	Xp22.3	X
-0.293743	4.81965	-4.16717	3.35e-05	0.000296917	1.68888	PNPLA4	Xp22.3	X
-0.515962	-0.268819	-4.10443	4.38e-05	0.000359296	1.43647	BMX	Xp22.2	X
-0.177992	0.20944	-2.36088	0.0184214	0.0493496	-4.07846	EEF1B2P3	Xp22.11	X
-0.243889	4.16644	-5.26921	1.68e-07	3.44e-06	6.71971	ZRSR2	Xp22.1	X			zinc finger (CCCH type), RNA-binding motif and serine/arginine rich 2	8233	X:15790472-15823260	1	Yes	22.2	yes		MDS, CLL			L	Rec	TSG	F, S, Mis				8233,ENSG00000169249.12,Q15696,U2AF1-RS2,U2AF1L2,URP,ZC3H22,ZRSR2	X	15790472	15823260
-0.358088	3.98751	-2.84817	0.00448682	0.0155733	-2.83125	RAI2	Xp22	X	TS- low levels linked to BC cell metastasis; Methyl in CRC	PMID: 25716347; PMID: 29796120
-0.392427	3.27791	-3.40484	0.000688194	0.00334411	-1.12599	DMD	Xp21.2	X	TS- putative function for Full Length protein	PMID: 33188621
-0.246427	-1.17338	-2.57907	0.0100477	0.0309451	-3.54846	LANCL3	Xp21.1	X	? Poss Pseudogene?
-0.43018	3.47467	-2.53129	0.011516	0.0343386	-3.6685	MAOA	Xp11.4-p11.3	X	TS in LUAD acts by abrogating aerobic glycolysis	PMID: 33763378
-0.472154	0.272226	-4.05276	5.45e-05	0.000406436	1.23136	CFP	Xp11.4	X
-0.35671	4.35963	-2.99952	0.00277065	0.010386	-2.39709	TMEM47	Xp11.4	X	TS in melanoma	PMID: 21606880
-0.451227	2.75866	-3.79513	0.000156383	0.00095876	0.246362	TSPAN7	Xp11.4	X
-0.19691	1.43229	-2.86001	0.00432394	0.0150878	-2.79807	CHST7	Xp11.3	X
-0.581548	-0.380244	-4.93442	9.4e-07	1.54e-05	5.07279	MIR222HG	Xp11.3	X	LncRNA
-0.639108	-0.0658917	-4.3916	1.24e-05	0.000124372	2.62202	RGN	Xp11.3	X	TS role in PC & BC	PMID: 27411833; PMID: 25128811
-0.533838	0.239207	-3.50275	0.000480736	0.00248317	-0.795345	CACNA1F	Xp11.23	X
-0.182307	7.28035	-4.53104	6.57e-06	7.44e-05	3.22546	KDM5C	Xp11.22-p11.21	X			lysine (K)-specific demethylase 5C (JARID1C)	8242	X:53192152-53225422	1		11.22	yes		clear cell renal carcinoma			E	Rec	TSG	N, F, S, Mis		yes	X-linked mental retardation syndromic Claes-Jensen-type.	8242,DXS1272E,ENSG00000126012.11,JARID1C,KDM5C,MRX13,P41229,SMCX,XE169	X	53192152	53225422
-0.201633	3.47633	-2.38154	0.0174258	0.0478298	-4.03028	SHROOM4	Xp11.22	X	? No Cancer role yet identified
-0.189395	5.50158	-3.16364	0.00160487	0.00657997	-1.90141	KDM6A	Xp11.2	X			lysine (K)-specific demethylase 6A, UTX	7403	X:44873511-45112602	1	Yes	11.3	yes		renal cell carcinoma, bladder carcinoma, oesophageal SCC, MM, medulloblastoma, T-ALL, other tumour types			E, L	Rec	oncogene, TSG	D, N, F, S		yes	Kabuki syndrome	7403,ENSG00000147050.14,KDM6A,O15550,UTX	X	44873511	45112602
Centromere
logFC	AveExpr	t	P.Value	adj.P.Val	B	Xi Del symbol	Chromosome	Chrm			Name	Entrez_GeneId	Genome_Location	Tier	Hallmark	Chr_Band	Somatic	Germline	Tumour_Types(Somatic)	Tumour_Types(Germline)	Cancer_Syndrome	Tissue_Type	Molecular_Genetics	Role_in_Cancer	Mutation_Types	Translocation_Partner	Other_Germline_Mut	Other_Syndrome	Synonyms	chr	start	end
-0.258577	1.70227	-2.50366	0.0124493	0.0366221	-3.73688	EDA2R	Xq11.1	X	TS - upon ligand engagement activates WT-p53 to induce cell death	PMID: 20434500
-0.568281	-2.2062	-3.51003	0.000467919	0.00245564	-0.770393	SLC7A3	Xq12	X	? Up-regulatied by WT- p53 under Glutamine starvation - ie. expect no elevation with TP53 mutation	PMID: 30865893
-0.240123	-1.43919	-2.80707	0.00509601	0.0175025	-2.9453	ARR3	Xq13.1	X
-0.285412	10.5843	-4.57691	5.31e-06	6.22e-05	3.42796	RPS4X	Xq13.1	X
-0.173777	3.13011	-2.47559	0.0134656	0.0387432	-3.80561	STARD8	Xq13.1	X	TS shown in CRC; where gene promoter highly methylation; downregulated in BrCA, Ovarian, PrCa, liver; & GC	PMID: 19750230; PMID: 19750230; PMID: 17297465; PMID: 29849465
-0.266777	4.41356	-6.17051	9.85e-10	4.97e-08	11.6573	JPX	Xq13.2	X
-0.221296	-1.7522	-2.60834	0.00923325	0.0291855	-3.47386	MAP2K4P1	Xq13.2	X	?Pseudogene - function?
-1.08129	-1.59396	-10.547	9.71635e-25	6.37393e-22	45.3376	TSIX	Xq13.2	X
-1.71709	6.21777	-10.3701	5.23e-24	1.72e-21	43.6881	XIST	Xq13.2	X
-0.39554	3.79821	-3.21426	0.00134944	0.00571119	-1.74329	ITM2A	Xq13.3-q21.2	X	TS induced PD-1 in BRCA & higher levels of TILs	PMID: 33680917
-0.307751	3.2701	-2.76189	0.00585159	0.0195849	-3.06884	ARMCX4	Xq22	X	TS in CRC	PMID: 35269880
-0.773276	1.27542	-4.15512	3.53e-05	0.000304492	1.64012	COL4A6	Xq22	X	TS in PC	PMID: 32551898
-0.308564	2.38293	-3.35216	0.000831718	0.00381543	-1.3001	GPRASP1	Xq22.1	X	TS function in HN	PMID: 36264603
-0.266727	0.411119	-2.74482	0.00616232	0.0204166	-3.11498	TCEAL7	Xq22.1	X	TS in melanoma	PMID: 35336819
-0.65932	-1.49172	-3.79901	0.00015399	0.000952996	0.260729	TCEAL2	Xq22.1-q22.3	X	TS in Renal cancer; Low levels in 9 cancers including BC	PMC7538002; PMC9527986
-0.497021	-2.2476	-3.6816	0.000244099	0.00141707	-0.167776	TCEAL5	Xq22.2	X
-0.322575	0.612686	-2.41578	0.015879	0.0442493	-3.94947	PAK3	Xq22.3	X	Low levels with poor BC survivalPMID: 31987914
-0.380509	-1.46459	-2.52509	0.0117196	0.0347877	-3.68389	KIAA1210	Xq24	X
-0.349583	0.979804	-2.92374	0.0035361	0.0128159	-2.61723	TMEM255A	Xq24	X	? No Cancer role yet identified
-0.402099	-0.143535	-2.55023	0.0109127	0.0329894	-3.62119	GRIA3	Xq25	X	Elevation Promotes Pancreatic Cancer	PMID: 20689760
-0.402058	-0.781755	-2.56462	0.0104731	0.031955	-3.585	TENM1	Xq25	X	Low levels in BrCa but varies with cancer type, possibly reflecting the particular splice variant expressed	PMID: 33652578
-0.382257	-0.635352	-2.56213	0.0105479	0.0320343	-3.59126	XPNPEP2	Xq25	X
-0.274089	2.78005	-3.17283	0.0015554	0.00641725	-1.87288	INTS6L	Xq26	X	TS in PC - Deleted & Promoter Hypermethylated	PMID: 19906297
-0.809381	-2.19504	-3.21548	0.00134379	0.00571119	-1.73945	ARHGAP36	Xq26.1	X	Function unclear in cancer; Role confused by isoforms	PMID: 35180567; PMID: 25024229
-0.408668	1.62043	-2.49725	0.0126751	0.0371198	-3.75264	CCDC160	Xq26.2	X
-0.53475	0.992571	-3.91353	9.71e-05	0.000663361	0.691268	SMIM10L2A	Xq26.3	X	? Protein coding or LncRNA?
-0.523769	-0.639364	-4.15097	3.59e-05	0.000305946	1.62336	AVPR2	Xq28	X
-0.214653	1.96845	-2.46531	0.0138555	0.0396908	-3.83057	GAB3	Xq28	X	TS Required for cytokine-mediated NK cell priming and expansion	PMID: 31375526
-0.36955	-0.768877	-2.58929	0.00975641	0.0303327	-3.52252	PRRG3	Xq28	X	? No Cancer role yet identified	PMID: 33281882

## Sheet: Tab2
logFC	AveExpr	t	P.Value	adj.P.Val	B	Xi Del symbol	Chromosome	Chrm	Role	Reference	Name	Entrez_GeneId	Genome_Location	Tier	Hallmark	Chr_Band	Somatic	Germline	Tumour_Types(Somatic)	Tumour_Types(Germline)	Cancer_Syndrome	Tissue_Type	Molecular_Genetics	Role_in_Cancer	Mutation_Types	Translocation_Partner	Other_Germline_Mut	Other_Syndrome	Synonyms	chr	start	end
-0.45282	5.33923	-8.74357	9.34441e-18	2.04331e-15	29.6103	AKAP17A	Xp22.33 and Yp11.32	X
-0.575505	0.484629	-4.53893	6.33727e-06	7.29342e-05	3.26016	ASMTL-AS1	Xp22.33 and Yp11.32	X
-0.364057	5.27632	-5.26905	1.67762e-07	3.43913e-06	6.71891	GTPBP6	Xp22.33 and Yp11.32	X
-0.641802	-0.604325	-5.68429	1.72039e-08	5.37416e-07	8.9031	LINC00106	Xp22.33 and Yp11.32	X
-0.526733	-0.621192	-5.38691	8.9273e-08	2.25243e-06	7.32298	LINC00685	Xp22.33 and Yp11.32	X
-0.221607	4.02215	-2.88129	0.00404469	0.0141889	-2.73812	PLCXD1	Xp22.33 and Yp11.32	X
-0.257056	2.17504	-4.06561	5.16477e-05	0.000389435	1.28215	CD99P1	Xp22.33 and Yp11.31	X
-0.188619	4.64337	-3.50716	0.000472929	0.00246223	-0.780227	DHRSX	Xp22.33 and Yp11.2	X
-0.248629	6.25225	-5.03327	5.71079e-07	1.01251e-05	5.54839	ZBED1	Xp22.33 and Yp11	X							a
-0.333739	8.51139	-4.50958	7.26052e-06	7.93817e-05	3.1314	SLC25A6	Xp22.32 and Yp11.3	X
-0.170186	4.253	-2.94323	0.00332276	0.0121773	-2.56115	PUDP	Xp22.32	X
-0.277276	4.53648	-3.07716	0.00214641	0.00858563	-2.16582	STS	Xp22.32	X
-0.417818	3.16095	-5.98745	2.96343e-09	1.29601e-07	10.5957	IL3RA	Xp22.3 and Yp13.3	X
-0.285755	5.06615	-4.18062	3.1605e-05	0.000284012	1.74345	ASMTL	Xp22.3 and Yp11.3	X
-0.310069	3.54533	-4.08706	4.71703e-05	0.000375595	1.36723	PPP2R3B	Xp22.3 and Yp11.3	X
-0.339607	6.85747	-4.68012	3.25923e-06	3.95936e-05	3.89064	ARSD	Xp22.3	X
-0.293743	4.81965	-4.16717	3.34937e-05	0.000296917	1.68888	PNPLA4	Xp22.3	X
-0.515962	-0.268819	-4.10443	4.38165e-05	0.000359296	1.43647	BMX	Xp22.2	X
-0.177992	0.20944	-2.36088	0.0184214	0.0493496	-4.07846	EEF1B2P3	Xp22.11	X
-0.243889	4.16644	-5.26921	1.67623e-07	3.43913e-06	6.71971	ZRSR2	Xp22.1	X			zinc finger (CCCH type), RNA-binding motif and serine/arginine rich 2	8233	X:15790472-15823260	1	Yes	22.2	yes		MDS, CLL			L	Rec	TSG	F, S, Mis				8233,ENSG00000169249.12,Q15696,U2AF1-RS2,U2AF1L2,URP,ZC3H22,ZRSR2	X	15790472	15823260
-0.358088	3.98751	-2.84817	0.00448682	0.0155733	-2.83125	RAI2	Xp22	X	TS- low levels linked to BC cell metastasis; Methyl in CRC	PMID: 25716347; PMID: 29796120
-0.392427	3.27791	-3.40484	0.000688194	0.00334411	-1.12599	DMD	Xp21.2	X	TS- putative function for Full Length protein	PMID: 33188621
-0.246427	-1.17338	-2.57907	0.0100477	0.0309451	-3.54846	LANCL3	Xp21.1	X	? Poss Pseudogene?
-0.43018	3.47467	-2.53129	0.011516	0.0343386	-3.6685	MAOA	Xp11.4-p11.3	X	TS in LUAD acts by abrogating aerobic glycolysis	PMID: 33763378
-0.472154	0.272226	-4.05276	5.45219e-05	0.000406436	1.23136	CFP	Xp11.4	X
-0.35671	4.35963	-2.99952	0.00277065	0.010386	-2.39709	TMEM47	Xp11.4	X	TS in melanoma	PMID: 21606880
-0.451227	2.75866	-3.79513	0.000156383	0.00095876	0.246362	TSPAN7	Xp11.4	X
-0.19691	1.43229	-2.86001	0.00432394	0.0150878	-2.79807	CHST7	Xp11.3	X
-0.581548	-0.380244	-4.93442	9.40418e-07	1.54102e-05	5.07279	MIR222HG	Xp11.3	X	LncRNA
-0.639108	-0.0658917	-4.3916	1.24433e-05	0.000124372	2.62202	RGN	Xp11.3	X	TS role in PC & BC	PMID: 27411833; PMID: 25128811
-0.533838	0.239207	-3.50275	0.000480736	0.00248317	-0.795345	CACNA1F	Xp11.23	X
-0.182307	7.28035	-4.53104	6.57379e-06	7.43518e-05	3.22546	KDM5C	Xp11.22-p11.21	X			lysine (K)-specific demethylase 5C (JARID1C)	8242	X:53192152-53225422	1		11.22	yes		clear cell renal carcinoma			E	Rec	TSG	N, F, S, Mis		yes	X-linked mental retardation syndromic Claes-Jensen-type.	8242,DXS1272E,ENSG00000126012.11,JARID1C,KDM5C,MRX13,P41229,SMCX,XE169	X	53192152	53225422
-0.201633	3.47633	-2.38154	0.0174258	0.0478298	-4.03028	SHROOM4	Xp11.22	X	? No Cancer role yet identified
-0.189395	5.50158	-3.16364	0.00160487	0.00657997	-1.90141	KDM6A	Xp11.2	X			lysine (K)-specific demethylase 6A, UTX	7403	X:44873511-45112602	1	Yes	11.3	yes		renal cell carcinoma, bladder carcinoma, oesophageal SCC, MM, medulloblastoma, T-ALL, other tumour types			E, L	Rec	oncogene, TSG	D, N, F, S		yes	Kabuki syndrome	7403,ENSG00000147050.14,KDM6A,O15550,UTX	X	44873511	45112602
Centromere
logFC	AveExpr	t	P.Value	adj.P.Val	B	Xi Del symbol	Chromosome	Chrm			Name	Entrez_GeneId	Genome_Location	Tier	Hallmark	Chr_Band	Somatic	Germline	Tumour_Types(Somatic)	Tumour_Types(Germline)	Cancer_Syndrome	Tissue_Type	Molecular_Genetics	Role_in_Cancer	Mutation_Types	Translocation_Partner	Other_Germline_Mut	Other_Syndrome	Synonyms	chr	start	end
-0.258577	1.70227	-2.50366	0.0124493	0.0366221	-3.73688	EDA2R	Xq11.1	X	TS - upon ligand engagement activates WT-p53 to induce cell death	PMID: 20434500
-0.568281	-2.2062	-3.51003	0.000467919	0.00245564	-0.770393	SLC7A3	Xq12	X	? Up-regulatied by WT- p53 under Glutamine starvation - ie. expect no elevation with TP53 mutation	PMID: 30865893
-0.240123	-1.43919	-2.80707	0.00509601	0.0175025	-2.9453	ARR3	Xq13.1	X
-0.285412	10.5843	-4.57691	5.30856e-06	6.2186e-05	3.42796	RPS4X	Xq13.1	X
-0.173777	3.13011	-2.47559	0.0134656	0.0387432	-3.80561	STARD8	Xq13.1	X	TS shown in CRC; where gene promoter highly methylation; downregulated in BrCA, Ovarian, PrCa, liver; & GC	PMID: 19750230; PMID: 19750230; PMID: 17297465; PMID: 29849465
-0.266777	4.41356	-6.17051	9.85498e-10	4.97298e-08	11.6573	JPX	Xq13.2	X
-0.221296	-1.7522	-2.60834	0.00923325	0.0291855	-3.47386	MAP2K4P1	Xq13.2	X	?Pseudogene - function?
-1.08129	-1.59396	-10.547	9.71635e-25	6.37393e-22	45.3376	TSIX	Xq13.2	X
-1.71709	6.21777	-10.3701	5.23461e-24	1.71695e-21	43.6881	XIST	Xq13.2	X
-0.39554	3.79821	-3.21426	0.00134944	0.00571119	-1.74329	ITM2A	Xq13.3-q21.2	X	TS induced PD-1 in BRCA & higher levels of TILs	PMID: 33680917
-0.307751	3.2701	-2.76189	0.00585159	0.0195849	-3.06884	ARMCX4	Xq22	X	TS in CRC	PMID: 35269880
-0.773276	1.27542	-4.15512	3.52765e-05	0.000304492	1.64012	COL4A6	Xq22	X	TS in PC	PMID: 32551898
-0.308564	2.38293	-3.35216	0.000831718	0.00381543	-1.3001	GPRASP1	Xq22.1	X	TS function in HN	PMID: 36264603
-0.266727	0.411119	-2.74482	0.00616232	0.0204166	-3.11498	TCEAL7	Xq22.1	X	TS in melanoma	PMID: 35336819
-0.65932	-1.49172	-3.79901	0.00015399	0.000952996	0.260729	TCEAL2	Xq22.1-q22.3	X	TS in Renal cancer; Low levels in 9 cancers including BC	PMID: 33061644; PMID: 36199541
-0.497021	-2.2476	-3.6816	0.000244099	0.00141707	-0.167776	TCEAL5	Xq22.2	X
-0.322575	0.612686	-2.41578	0.015879	0.0442493	-3.94947	PAK3	Xq22.3	X	Low levels with poor BC survival	PMID: 31987914
-0.380509	-1.46459	-2.52509	0.0117196	0.0347877	-3.68389	KIAA1210	Xq24	X
-0.349583	0.979804	-2.92374	0.0035361	0.0128159	-2.61723	TMEM255A	Xq24	X	? No Cancer role yet identified
-0.402099	-0.143535	-2.55023	0.0109127	0.0329894	-3.62119	GRIA3	Xq25	X	Elevation Promotes Pancreatic Cancer	PMID: 20689760
-0.402058	-0.781755	-2.56462	0.0104731	0.031955	-3.585	TENM1	Xq25	X	Low levels in BrCa but varies with cancer type, possibly reflecting the particular splice variant expressed	PMID: 33652578
-0.382257	-0.635352	-2.56213	0.0105479	0.0320343	-3.59126	XPNPEP2	Xq25	X
-0.274089	2.78005	-3.17283	0.0015554	0.00641725	-1.87288	INTS6L	Xq26	X	TS in PC - Deleted & Promoter Hypermethylated	PMID: 19906297
-0.809381	-2.19504	-3.21548	0.00134379	0.00571119	-1.73945	ARHGAP36	Xq26.1	X	Function unclear in cancer; Role confused by isoforms	PMID: 35180567; PMID: 25024229
-0.408668	1.62043	-2.49725	0.0126751	0.0371198	-3.75264	CCDC160	Xq26.2	X
-0.53475	0.992571	-3.91353	9.70773e-05	0.000663361	0.691268	SMIM10L2A	Xq26.3	X	? Protein coding or LncRNA?
-0.523769	-0.639364	-4.15097	3.59113e-05	0.000305946	1.62336	AVPR2	Xq28	X
-0.214653	1.96845	-2.46531	0.0138555	0.0396908	-3.83057	GAB3	Xq28	X	TS Required for cytokine-mediated NK cell priming and expansion	PMID: 31375526
-0.36955	-0.768877	-2.58929	0.00975641	0.0303327	-3.52252	PRRG3	Xq28	X	? No Cancer role yet identified	PMID: 33281882
References
PMID	Citation
25716347	Werner, S., Brors, B., Eick, J., Marques, E., Pogenberg, V., Parret, A., … Wikman, H. (2015). Suppression of early hematogenous dissemination of human breast cancer cells to bone marrow by retinoic Acid-induced 2. Cancer Discovery, 5(5), 506–519. doi:10.1158/2159-8290.CD-14-1042
29796120	Yan, W., Wu, K., Herman, J. G., Xu, X., Yang, Y., Dai, G., & Guo, M. (2018). Retinoic acid-induced 2 (RAI2) is a novel tumor suppressor, and promoter region methylation of RAI2 is a poor prognostic marker in colorectal cancer. Clinical Epigenetics, 10, 69. doi:10.1186/s13148-018-0501-4
33188621	Jones, L., Naidoo, M., Machado, L. R., & Anthony, K. (2021). The Duchenne muscular dystrophy gene and cancer. Cellular Oncology, 44(1), 19–32. doi:10.1007/s13402-020-00572-y
33763378	Huang, Y., Zhao, W., Ouyang, X., Wu, F., Tao, Y., & Shi, M. (2021). Monoamine oxidase A inhibits lung adenocarcinoma cell proliferation by abrogating aerobic glycolysis. Frontiers in Oncology, 11, 645821. doi:10.3389/fonc.2021.645821
21606880	Mithani, S. K., Smith, I. M., & Califano, J. A. (2011). Use of integrative epigenetic and cytogenetic analyses to identify novel tumor-suppressor genes in malignant melanoma. Melanoma Research, 21(4), 298–307. doi:10.1097/CMR.0b013e328344a003
27411833	Vaz, C. V., Correia, S., Cardoso, H. J., Figueira, M. I., Marques, R., Maia, C. J., & Socorro, S. (2016). The emerging role of regucalcin as a tumor suppressor: Facts and views. Current Molecular Medicine, 16(7), 607–619. doi:10.2174/1566524016666160714124550
25128811	Marques, R., Vaz, C. V., Maia, C. J., Gomes, M., Gama, A., Alves, G., … Socorro, S. (2015). Histopathological and in vivo evidence of regucalcin as a protective molecule in mammary gland carcinogenesis. Experimental Cell Research, 330(2), 325–335. doi:10.1016/j.yexcr.2014.08.007
20434500	Brosh, R., Sarig, R., Natan, E. B., Molchadsky, A., Madar, S., Bornstein, C., … Rotter, V. (2010). p53-dependent transcriptional regulation of EDA2R and its involvement in chemotherapy-induced hair loss. FEBS Letters, 584(11), 2473–2477. doi:10.1016/j.febslet.2010.04.058
30865893	Lowman, X. H., Hanse, E. A., Yang, Y., Ishak Gabra, M. B., Tran, T. Q., Li, H., & Kong, M. (2019). P53 promotes cancer cell adaptation to glutamine deprivation by upregulating Slc7a3 to increase arginine uptake. Cell Reports, 26(11), 3051-3060.e4. doi:10.1016/j.celrep.2019.02.037
33680917	Zhang, R., Xu, T., Xia, Y., Wang, Z., Li, X., & Chen, W. (2020). ITM2A as a tumor suppressor and its correlation with PD-L1 in breast cancer. Frontiers in Oncology, 10, 581733. doi:10.3389/fonc.2020.581733
35269880	Martin, M., Mundade, R., Hartley, A.-V., Jiang, G., Jin, J., Sun, S., … Lu, T. (2022). Using VBIM technique to discover ARMC4/ODAD2 as a novel negative regulator of NF-κB and a new tumor suppressor in colorectal cancer. International Journal of Molecular Sciences, 23(5), 2732. doi:10.3390/ijms23052732
32551898	Ma, J.-B., Bai, J.-Y., Zhang, H.-B., Gu, L., He, D., & Guo, P. (2020). Downregulation of collagen COL4A6 is associated with prostate cancer progression and metastasis. Genetic Testing and Molecular Biomarkers, 24(7), 399–408. doi:10.1089/gtmb.2020.0009
36264603	Zhang, T., Liu, G., Zhang, J., Chen, S., Deng, Z., & Xie, M. (2022). GPRASP1 is a candidate anti-oncogene and correlates with immune microenvironment and immunotherapeutic efficiency in head and neck cancer. Journal of Oral Pathology & Medicine: Official Publication of the International Association of Oral Pathologists and the American Academy of Oral Pathology. doi:10.1111/jop.13376
35336819	Xiong, Z., Wang, M., You, S., Chen, X., Lin, J., Wu, J., & Shi, X. (2022). Transcription regulation of Tceal7 by the triple complex of Mef2c, Creb1 and Myod. Biology, 11(3). doi:10.3390/biology11030446
33061644	Zhou, Y., Zhang, Y., Li, W., Xu, J., He, X., Li, X., & Wang, Y. (2020). TCEAL2 as a tumor suppressor in renal cell carcinoma is associated with the good prognosis of patients. Cancer Management and Research, 12, 9589–9597. doi:10.2147/CMAR.S271647
36199541	Sun, Y., & Zhao, J. (2022). Transcription elongation factor A (SII)-like (TCEAL) gene family member-TCEAL2: A novel prognostic marker in pan-cancer. Cancer Informatics, 21, 11769351221126284. doi:10.1177/11769351221126285
31987914	Dang, Y., Guo, Y., Ma, X., Chao, X., Wang, F., Cai, L., … Guo, X. (2020). Systemic analysis of the expression and prognostic significance of PAKs in breast cancer. Genomics, 112(3), 2433–2444. doi:10.1016/j.ygeno.2020.01.016
20689760	Ripka, S., Riedel, J., Neesse, A., Griesmann, H., Buchholz, M., Ellenrieder, V., … Michl, P. (2010). Glutamate receptor GRIA3--target of CUX1 and mediator of tumor progression in pancreatic cancer. Neoplasia (New York, N.Y.), 12(8), 659–667. doi:10.1593/neo.10486
33652578	Peppino, G., Ruiu, R., Arigoni, M., Riccardo, F., Iacoviello, A., Barutello, G., & Quaglino, E. (2021). Teneurins: Role in cancer and potential role as diagnostic biomarkers and targets for therapy. International Journal of Molecular Sciences, 22(5), 2321. doi:10.3390/ijms22052321
19906297	Filleur, S., Hirsch, J., Wille, A., Schön, M., Sell, C., Shearer, M. H., … Wieland, I. (2009). INTS6/DICE1 inhibits growth of human androgen-independent prostate cancer cells by altering the cell cycle profile and Wnt signaling. Cancer Cell International, 9(1), 28. doi:10.1186/1475-2867-9-28
35180567	Kreider-Letterman, G., Carr, N. M., & Garcia-Mata, R. (2022). Fixing the GAP: The role of RhoGAPs in cancer. European Journal of Cell Biology, 101(2), 151209. doi:10.1016/j.ejcb.2022.151209
25024229	Rack, P. G., Ni, J., Payumo, A. Y., Nguyen, V., Crapster, J. A., Hovestadt, V., … Chen, J. K. (2014). Arhgap36-dependent activation of Gli transcription factors. Proceedings of the National Academy of Sciences of the United States of America, 111(30), 11061–11066. doi:10.1073/pnas.1322362111
31375526	Sliz, A., Locker, K. C. S., Lampe, K., Godarova, A., Plas, D. R., Janssen, E. M., … Hoebe, K. (2019). Gab3 is required for IL-2- and IL-15-induced NK cell expansion and limits trophoblast invasion during pregnancy. Science Immunology, 4(38), eaav3866. doi:10.1126/sciimmunol.aav3866
33281882	Zhang, E., He, J., Zhang, H., Shan, L., Wu, H., Zhang, M., & Song, Y. (2020). Immune-related gene-based novel subtypes to establish a model predicting the risk of prostate cancer. Frontiers in Genetics, 11, 595657. doi:10.3389/fgene.2020.595657
