# Supplementary material for: Establishing the Link between X-Chromosome Aberrations and TP53 Status, with Breast Cancer Patient Outcomes
Source: Cells. 2023 Sep 11;12(18):2245. doi: 10.3390/cells12182245 (PMC10526523; doi:10.3390/cells12182245)
Supplement: Supplementary file 1 [file cells-12-02245-s001.zip › Table S2.xls]

## Sheet: Supp Table 2
logFC	AveExpr	t	P.Value	adj.P.Val	B	symbol	Chromosome	Chrm	Name	Entrez_GeneId	Genome_Location	Tier	Hallmark	Chr_Band	Somatic	Germline	Tumour_Types(Somatic)	Tumour_Types(Germline)	Cancer_Syndrome	Tissue_Type	Molecular_Genetics	Role_in_Cancer	Mutation_Types	Translocation_Partner	Other_Germline_Mut	Other_Syndrome	Synonyms	chr	start	end
0.181546	4.5665	2.40787	0.0162252	0.0394211	-3.81783	ABCD1	Xq28	X
0.283228	5.92957	5.68201	1.74323e-08	4.07522e-07	8.98207	AIFM1	Xq26.1	X
0.2409	3.35896	3.94754	8.44606e-05	0.000494698	0.95013	AMER1	Xq11.1	X	APC membrane recruitment protein 1	139285	X:64185117-64205744	1	Yes	11.2	yes		Wilms tumour			O	Rec	TSG	F, D, N, Mis				139285,AMER1,ENSG00000184675.9,FAM123B,FLJ39827,Q5JTC6,RP11-403E24.2,WTX	X	64185117	64205744
0.167488	4.74236	2.86567	0.00424804	0.0133977	-2.63712	AP1S2	Xp22	X
0.227116	5.46354	4.74624	2.37274e-06	2.42427e-05	4.30542	APEX2	Xp11.23	X
0.507974	2.79333	4.56205	5.69115e-06	5.04512e-05	3.47912	APLN	Xq25	X
0.27811	4.07392	4.86794	1.30895e-06	1.45538e-05	4.86857	APOO	Xp22.11	X
0.170107	4.99786	2.81967	0.00490189	0.0150969	-2.7649	APOOL	Xq21.1	X
0.135102	6.19593	3.04876	0.00235802	0.00818446	-2.10846	ARAF	Xp11.3-p11.23	X	A-Raf proto-oncogene, serine/threonine kinase	369	X:47561100-47571920	2		11.3	yes		cholangiocarcinoma, lung adenocarcinoma, Langerhans cell histiocytosis			E, L		oncogene	Mis				369,ARAF,ARAF1,ENSG00000078061.12	X	47561100	47571920
0.153389	4.1052	3.49699	0.000491134	0.00214789	-0.678962	ATG4A	Xq22.3	X
0.204317	4.62374	3.13443	0.00177184	0.00642168	-1.85006	ATP11C	Xq27.1	X
0.260278	8.2157	4.70005	2.96331e-06	2.77705e-05	4.09527	ATP6AP1	Xq28	X
0.187571	7.71775	3.93451	8.91026e-05	0.000512704	0.900321	ATP6AP2	Xp11.4	X
0.328721	8.11986	5.40938	7.90634e-08	1.44071e-06	7.53771	BCAP31	Xq28	X
0.241572	5.86384	2.33074	0.0199642	0.0461145	-3.99683	BEX3	Xq22.2	X
0.261357	5.10901	3.03367	0.0024781	0.00855237	-2.15325	BEX4	Xq22.1-q22.3	X
0.242113	5.29419	4.70554	2.88637e-06	2.74414e-05	4.12014	BRCC3	Xq28	X
0.251029	4.99866	4.84443	1.46989e-06	1.58073e-05	4.7587	C1GALT1C1	Xq24	X
0.131957	2.75198	2.63929	0.00843674	0.0233523	-3.24626	CA5BP1	Xp22.2	X
0.220895	6.22917	3.21328	0.00135405	0.00510491	-1.60603	CASK	Xp11.4	X
0.108639	4.62168	2.46919	0.0137074	0.034219	-3.67143	CCDC120	Xp11.23	X
0.190883	4.77486	3.70572	0.000222298	0.00107226	0.0519239	CCDC22	Xp11.23	X
0.308807	7.0003	6.48768	1.36617e-10	5.97473e-09	13.6361	CDK16	Xp11	X
0.21483	4.36454	2.61325	0.00910266	0.0245734	-3.31315	CDKL5	Xp22	X
0.528372	2.43136	6.84816	1.30122e-11	1.38962e-09	15.9018	CENPI	Xq22.1	X
0.405589	6.29787	7.78723	1.70016e-14	1.11531e-11	22.3216	CETN2	Xq28	X
0.220163	3.32095	3.48919	0.000505506	0.0021674	-0.70546	CLCN5	Xp11.23	X
0.336822	-3.24309	2.30737	0.021237	0.0482059	-4.04994	CNGA2	Xq27	X
0.20561	6.35084	3.83586	0.000132925	0.000703214	0.528482	COX7B	Xq21.1	X
0.210174	4.41503	4.73387	2.51875e-06	2.50348e-05	4.24895	CSTF2	Xq22.1	X
0.437864	5.69779	6.84201	1.35575e-11	1.38962e-09	15.8622	CTPS2	Xp22	X
0.165613	6.65859	3.88692	0.000108186	0.000586529	0.719797	CUL4B	Xq23	X
0.226176	4.64337	4.5037	7.46084e-06	6.19533e-05	3.22391	DHRSX	Xp22.33 and Yp11.2	X
0.297157	6.42114	6.71231	3.19768e-11	2.23468e-09	15.0348	DKC1	Xq28	X
0.183776	6.43371	3.91154	9.78751e-05	0.000544119	0.812942	DLG3	Xq13.1	X
0.264492	-2.20179	2.61897	0.00895253	0.0243687	-3.29852	DLG3-AS1	Xq13.1	X
0.402737	-0.00866061	3.93239	8.98795e-05	0.000512704	0.892241	DRP2	Xq22	X
0.356972	5.34076	5.43058	7.04584e-08	1.35943e-06	7.64765	EBP	Xp11.23-p11.22	X
0.184255	6.56307	3.90854	9.90829e-05	0.000546205	0.801533	EIF1AX	Xp22.13	X	eukaryotic translation initiation factor 1A, X-linked	107984923	X:20124518-20141844	2		22.12	yes		uveal melanoma, thyroid cancer (PDTC and ATC), low grade serous ovarian cancer			E			Mis, S				107984923,EIF1A,EIF1AX,EIF4C,ENSG00000173674.10,P47813,eIF-1A,eIF-4C	X	20124518	20141844
0.228462	8.05641	4.66878	3.4407e-06	3.17901e-05	3.95412	EIF2S3	Xp22.2-p22.1	X
0.224126	-1.05136	3.025	0.00254961	0.00866602	-2.1789	EIF4A1P10	Xq21.31	X
0.137691	5.50601	3.48347	0.0005163	0.00218799	-0.724868	ELK1	Xp11.23	X
0.200824	6.06935	4.12622	3.99315e-05	0.000269981	1.64915	EMD	Xq27.3-q28	X
0.138595	4.06756	3.10984	0.00192461	0.00693707	-1.92494	ENOX2	Xq25	X
0.45956	2.6037	5.55285	3.59744e-08	7.61265e-07	8.28947	ERCC6L	Xq13.1	X
0.247234	3.77136	4.86247	1.34481e-06	1.47033e-05	4.84296	FAM104B	Xp11.22	X
0.258493	4.35627	3.80787	0.000148666	0.0007802	0.424614	FAM120C	Xp11.22	X
0.189685	6.16342	3.86158	0.000119863	0.000644509	0.624542	FAM199X	Xq22	X
0.232869	5.22295	3.70069	0.000226687	0.00108545	0.0338424	FAM3A	Xq28	X
0.273263	6.0436	3.84667	0.00012728	0.000678824	0.568777	FAM50A	Xq28	X
0.263658	0.717611	3.98958	7.09968e-05	0.00043527	1.1119	FANCB	Xp22.2	X
0.302215	4.68509	4.48781	8.02775e-06	6.58276e-05	3.15492	FGD1	Xp11.21	X
0.225038	5.9064	4.97193	7.79197e-07	9.4658e-06	5.36046	FMR1	Xq27.3	X
0.182821	5.35602	4.90766	1.07494e-06	1.23713e-05	5.05525	FTSJ1	Xp11.23	X
0.27099	4.43744	5.12379	3.58992e-07	5.01061e-06	6.0966	FUNDC1	Xp11.4	X
0.201339	6.03572	4.52319	6.81813e-06	5.88513e-05	3.30879	FUNDC2	Xq28	X
0.287147	6.09483	4.17303	3.26601e-05	0.000225527	1.8372	G6PD	Xq28	X
0.611531	-2.65899	3.22478	0.00130136	0.00496332	-1.56995	GABRA3	Xq28	X
0.212081	-0.936152	2.48242	0.0132119	0.0332069	-3.63937	GAPDHP65	Xp11.3	X
0.259882	7.44119	5.1806	2.67234e-07	4.17395e-06	6.37736	GDI1	Xq28	X
0.171799	4.36907	3.52651	0.000440097	0.00198996	-0.578091	GEMIN8	Xp22	X
0.174019	3.11773	2.33866	0.0195486	0.0453141	-3.97873	GK	Xp21.3	X
0.205303	4.75502	4.2802	2.04596e-05	0.000145886	2.27548	GPKOW	Xp11.23	X
0.525645	1.98612	3.94948	8.37899e-05	0.000494698	0.957554	GPR143	Xp22.3	X
0.109836	5.74206	2.4549	0.0142609	0.0354362	-3.70586	GRIPAP1	Xp11.23	X
0.553061	1.13733	2.5449	0.0110796	0.028842	-3.48564	GRPR	Xp22.2	X
0.253425	4.59868	5.72122	1.39498e-08	3.38929e-07	9.19529	HCCS	Xp22	X
0.108515	5.80119	2.76605	0.00577798	0.0166976	-2.91124	HDAC6	Xp11.23	X
0.166167	4.33907	4.21848	2.68187e-05	0.000189173	2.02174	HDAC8	Xq13	X
0.435877	6.04847	4.52	6.91975e-06	5.89527e-05	3.29484	HMGB3	Xq28	X
0.0971712	7.03665	2.32211	0.0204264	0.0470165	-4.01651	HNRNPH2	Xq22	X
0.387093	5.27555	6.62448	5.6712e-11	3.18734e-09	14.4827	HPRT1	Xq26.2	X
0.316911	6.31295	5.09665	4.12952e-07	5.64367e-06	5.96348	HSD17B10	Xp11.2	X
0.259986	-1.41823	2.51289	0.0121304	0.0309633	-3.56487	HSPA8P1	Xq24	X
0.442653	-1.95205	5.14917	3.14755e-07	4.65623e-06	6.22166	HSPB1P2	Xp11.23	X
0.230786	6.73505	5.24052	1.95118e-07	3.19994e-06	6.67673	HTATSF1	Xq26.3	X
0.135754	8.54102	2.70616	0.00692203	0.0196574	-3.07147	HUWE1	Xp11.22	X
0.199518	5.70406	3.76982	0.000172891	0.000873112	0.284647	IDH3G	Xq28	X
0.14174	2.29275	2.54956	0.0109337	0.0285756	-3.47403	IKBKG	Xq28	X
0.139608	7.59754	2.57064	0.010294	0.0272294	-3.4212	IL13RA1	Xq24	X
0.153889	6.99428	2.52265	0.0118008	0.0302396	-3.5408	IRAK1	Xq28	X
0.261019	5.07913	3.13858	0.00174717	0.00636748	-1.83736	JADE3	Xp11.3	X
0.121936	7.28035	3.24412	0.00121699	0.00466868	-1.50896	KDM5C	Xp11.22-p11.21	X	lysine (K)-specific demethylase 5C (JARID1C)	8242	X:53192152-53225422	1		11.22	yes		clear cell renal carcinoma			E	Rec	TSG	N, F, S, Mis		yes	X-linked mental retardation syndromic Claes-Jensen-type.	8242,DXS1272E,ENSG00000126012.11,JARID1C,KDM5C,MRX13,P41229,SMCX,XE169	X	53192152	53225422
0.520761	4.51838	5.98359	3.03306e-09	8.29036e-08	10.6571	KIF4A	Xq13.1	X
0.295745	-1.99632	3.36923	0.000782445	0.00314898	-1.10592	KRT18P11	Xq21.31	X
0.342426	-1.85007	3.01357	0.00264672	0.00885841	-2.21258	KRT8P8	Xq28	X
0.440214	4.69063	5.05058	5.22929e-07	6.7263e-06	5.73912	LAGE3	Xq28	X
0.229272	8.00183	4.45988	9.12508e-06	7.39019e-05	3.03428	LAMP2	Xq24	X
0.294145	5.88321	6.79626	1.83804e-11	1.50719e-09	15.5687	LAS1L	Xq12	X
0.233689	5.51858	2.41406	0.0159537	0.0389058	-3.80322	LDOC1	Xq27	X
0.138556	5.06145	2.3779	0.0175976	0.0417116	-3.88807	LINC01278	Xq11.1	X
0.691854	-2.8968	2.79879	0.00522761	0.0158033	-2.82221	MAGEA3	Xq28	X
0.566034	-3.03017	2.39648	0.0167353	0.0405106	-3.84463	MAGEA6	Xq28	X
0.609231	-3.22199	3.1883	0.00147534	0.00549901	-1.68398	MAGEC2	Xq27	X
0.306488	9.31272	3.76962	0.000173025	0.000873112	0.283926	MAGED2	Xp11.2	X
0.193704	4.44677	2.83873	0.00462064	0.0143656	-2.71221	MAGEH1	Xp11.22	X
0.301935	2.14695	3.42222	0.000646171	0.00268284	-0.930723	MAGIX	Xp11.23	X
0.144926	7.02572	3.02992	0.00250878	0.00857165	-2.16434	MAGT1	Xq21.1	X
0.293932	5.10049	4.95216	8.60601e-07	1.02646e-05	5.26617	MBTPS2	Xp22.12-p22.11	X
0.332115	5.21912	7.05881	3.12887e-12	5.13134e-10	17.2773	MCTS1	Xq24	X
0.205772	6.17623	4.02943	6.01316e-05	0.000379292	1.26679	MED14	Xp11.4	X
0.192401	5.1597	2.53644	0.0113489	0.0293106	-3.50666	MID1IP1	Xp11.4	X
0.189561	3.61515	2.63043	0.00865832	0.0237651	-3.2691	MID2	Xq22.1-q22.2	X
0.151088	5.19752	2.89055	0.00392843	0.0124495	-2.56717	MMGT1	Xq26.3	X
0.183919	5.12294	2.84418	0.00454294	0.0141913	-2.69707	MORC4	Xq22.3	X
0.288667	8.38022	5.44888	6.37664e-08	1.2676e-06	7.74288	MORF4L2	Xq22	X
0.29191	3.83056	6.6202	5.83051e-11	3.18734e-09	14.456	MOSPD1	Xq26.3	X
0.141511	5.50136	3.08238	0.00210951	0.00748022	-2.00789	MTMR1	Xq28	X
0.291153	5.02247	4.28905	1.96759e-05	0.000141839	2.31212	NAA10	Xq28	X
0.304773	6.2437	5.07172	4.69354e-07	6.15793e-06	5.84181	NDUFA1	Xq24	X
0.250082	6.3485	3.96384	7.89747e-05	0.000479698	1.01267	NDUFB11	Xp11.3	X
0.24757	4.72059	6.52398	1.08359e-10	5.46797e-09	13.8591	NKAP	Xq24	X
0.270559	3.8308	6.46805	1.5478e-10	6.34599e-09	13.5159	NKRF	Xq24	X
0.18942	8.68158	5.14634	3.19406e-07	4.65623e-06	6.20771	NONO	Xq13.1	X	non-POU domain containing, octamer-binding	4841	X:71283583-71301168	1	Yes	13.1	yes		papillary renal			E	Dom	fusion	T	TFE3			4841,ENSG00000147140.15,NMT55,NONO,NRB54,P54,P54NRB,PPP1R114,Q15233	X	71283583	71301168
0.244932	0.24011	3.21361	0.00135252	0.00510491	-1.605	NOX1	Xq22	X
0.373968	4.92145	7.28547	6.47448e-13	2.12363e-10	18.7994	NSDHL	Xq28	X
0.300756	0.775933	2.35507	0.0187107	0.0438365	-3.94099	NUP62CL	Xq22.3	X
0.180072	4.28042	3.02029	0.00258918	0.00871028	-2.19278	NXT2	Xq22.3	X
0.297386	6.02837	5.47702	5.46667e-08	1.12067e-06	7.88985	OCRL	Xq25	X
0.137948	6.25498	3.79395	0.000157133	0.000811646	0.373242	OTUD5	Xp11.23	X
0.232447	-1.7493	3.26015	0.00115096	0.00444134	-1.45818	PABPC1P3	Xq13	X
0.126298	4.77895	2.37913	0.0175396	0.0417116	-3.88521	PBDC1	Xq13.2	X
0.229452	6.00104	5.28419	1.54848e-07	2.67317e-06	6.89689	PDHA1	Xp22.1	X
0.187215	4.13912	2.62679	0.00875075	0.0239187	-3.27845	PDK3	Xp22.12	X
0.251534	5.44059	4.90986	1.06323e-06	1.23713e-05	5.06564	PDZD11	Xq13.1	X
0.303454	8.75954	5.22528	2.11434e-07	3.38294e-06	6.60028	PGK1	Xq13.3	X
0.435147	1.88657	3.51517	0.00045908	0.00203484	-0.616925	PHEX	Xp22.2-p22.1	X
0.259715	5.32318	4.57493	5.35873e-06	4.81552e-05	3.53588	PHF6	Xq26	X	PHD finger protein 6	84295	X:134373312-134428789	1		26.2	yes		ETP ALL			L	Rec	TSG	F, N, S, Mis		yes	Boerjeson-Forssman-Lehmann syndrome	84295,BFLS,BORJ,CENP-31,ENSG00000156531.16,KIAA1823,MGC14797,PHF6,Q8IWS0	X	134373312	134428789
0.131702	5.94591	2.57333	0.0102149	0.0271295	-3.41443	PHF8	Xp11.22	X
0.247785	4.77958	3.52235	0.000446978	0.00199468	-0.59236	PHKA1	Xq12-q13	X
0.102005	5.15964	2.34326	0.0193104	0.0449207	-3.96818	PHKA2	Xp22.2-p22.1	X
0.212159	4.26958	3.91703	9.57093e-05	0.000541252	0.833759	PIN4	Xq13.1	X
0.505756	3.33021	5.39389	8.59814e-08	1.52443e-06	7.4577	PIR	Xp22.31	X
0.591278	-0.339687	4.055	5.40131e-05	0.000347378	1.36694	PLAC1	Xq26.3	X
0.173868	7.02182	2.56433	0.010482	0.0276153	-3.43707	PLP2	Xp11.23	X
0.210947	6.13044	3.39061	0.000724524	0.0029521	-1.03555	PLXNA3	Xq28	X
0.259691	4.91188	4.99602	6.89983e-07	8.54017e-06	5.47586	POLA1	Xp22.1-p21.3	X
0.174365	3.37951	3.33648	0.000879562	0.00351825	-1.21287	PORCN	Xp11.23	X
0.425617	1.28031	3.93321	8.95777e-05	0.000512704	0.895371	PPEF1	Xp22	X
0.204671	3.54533	2.912	0.00367072	0.0117463	-2.50641	PPP2R3B	Xp22.3 and Yp11.3	X
0.202713	5.65114	3.15884	0.00163128	0.00597834	-1.77515	PQBP1	Xp11.23	X
0.200818	4.97246	3.05989	0.00227295	0.0079588	-2.07529	PRAF2	Xp11.23	X
0.278061	6.39296	4.44731	9.66462e-06	7.7317e-05	2.98021	PRDX4	Xp22.11	X
0.194501	5.7912	2.99379	0.00282285	0.00939994	-2.27058	PRPS2	Xp22.2	X
0.291402	5.76097	6.82857	1.48282e-11	1.38962e-09	15.7758	PSMD10	Xq22.3	X
0.182896	4.253	3.39079	0.000724051	0.0029521	-1.03495	PUDP	Xp22.32	X
0.198207	-0.963277	2.93972	0.00336032	0.0110219	-2.42719	RAB41	Xq13.1	X
0.160072	4.80921	3.19891	0.00142266	0.00533295	-1.65095	RAB9A	Xp22.2	X
0.232489	0.981217	2.31461	0.0208354	0.0477902	-4.03355	RAB9B	Xq22.2	X
0.178026	5.8181	2.55627	0.0107262	0.0281455	-3.45725	RAP2C	Xq25	X
0.385191	7.55066	6.42908	1.98113e-10	7.64482e-09	13.2784	RBBP7	Xp22.22	X
0.126722	6.14972	2.95769	0.00317216	0.010457	-2.37546	RBM10	Xp11.3	X	RNA binding motif protein 10	8241	X:47145447-47186812	1	Yes	11.3	yes		lung adenocarcinoma			E	Rec/X	TSG	Mis, F, N		yes	TARP syndrome	8241,DXS8237E,ENSG00000182872.15,GPATC9,GPATCH9,KIAA0122,P98175,RBM10,S1-1,ZRANB5	X	47145447	47186812
0.130813	8.13096	2.77956	0.00554494	0.0163506	-2.87465	RBM3	Xp11.2	X
0.134022	3.53746	2.30534	0.0213509	0.0482971	-4.05453	RBM41	Xq22.3	X
0.10855	7.61923	3.89452	0.0001049	0.000573453	0.748476	RBMX	Xq26	X
0.190981	4.53506	4.51507	7.07913e-06	5.95373e-05	3.27339	RBMX2	Xq26.1	X
0.555885	5.50853	4.72974	2.5694e-06	2.51571e-05	4.23012	REPS2	Xp22.2	X
0.324505	1.74958	3.77903	0.000166709	0.000854385	0.318391	RIBC1	Xp11.23	X
0.145018	6.34589	2.9172	0.00361057	0.0116105	-2.4916	RLIM	Xq13-q21	X
0.187984	3.76781	3.72095	0.000209481	0.00101963	0.106871	RNF113A	Xq24	X
0.145944	4.35989	2.44641	0.0145993	0.0360042	-3.72624	RP2	Xp11.3	X
0.163441	6.18106	2.3509	0.0189204	0.0441701	-3.9506	RPL36A	Xq22.1	X
0.250765	6.8443	3.91355	9.70787e-05	0.000544119	0.820542	RPL39	Xq24	X
0.218318	4.09052	4.40864	1.15219e-05	9.10648e-05	2.81483	RRAGB	Xp11.21	X
0.522036	-3.22974	2.92859	0.00348199	0.0113641	-2.45909	S100G	Xp22.2	X
0.271983	1.46498	2.30737	0.0212366	0.0482059	-4.04993	SCML2	Xp22	X
0.39707	4.27675	4.38793	1.26522e-05	9.7645e-05	2.72684	SHROOM2	Xp22.3	X
0.243666	3.24636	6.08968	1.60874e-09	4.5884e-08	11.2656	SLC25A14	Xq24	X
0.139304	4.64903	2.4488	0.0145034	0.0359029	-3.72052	SLC25A43	Xq24	X
0.301119	7.95742	5.6247	2.40855e-08	5.26669e-07	8.67291	SLC25A5	Xq24	X
0.179263	0.764339	2.99203	0.00283905	0.00940613	-2.27572	SLC25A5-AS1	Xq24	X
0.163222	8.51139	2.35846	0.0185418	0.0435965	-3.93317	SLC25A6	Xp22.32 and Yp11.3	X
0.32012	5.82559	6.48929	1.35219e-10	5.97473e-09	13.646	SLC35A2	Xp11.23	X
0.286658	5.54657	3.10042	0.00198633	0.00708169	-1.9535	SLC6A8	Xq28	X
0.225108	7.24502	4.12024	4.09658e-05	0.00027145	1.62524	SMC1A	Xp11.22-p11.21	X	structural maintenance of chromosomes 1A	8243	X:53374149-53422728	2		11.22	yes		AML			L		TSG	Mis		yes	Cornelia de Lange syndrome	8243,DXS423E,ENSG00000072501.17,KIAA0178,Q14683,SB1.8,SMC1A,SMC1L1,Smcb	X	53374149	53422728
0.392973	6.89009	6.70266	3.40653e-11	2.23468e-09	14.9738	SMS	Xp22.1	X
0.151462	6.11104	4.32438	1.68212e-05	0.000125394	2.45926	SNX12	Xq13.1	X
0.242299	3.24036	3.48311	0.00051698	0.00218799	-0.726076	SPIN4	Xq11.1	X
0.256212	3.80624	5.12529	3.56223e-07	5.01061e-06	6.10397	SUV39H1	Xp11.23	X
0.361562	7.18363	6.38312	2.64628e-10	9.6442e-09	12.9999	SYAP1	Xp22.31	X
0.261242	-1.86969	2.77487	0.00562489	0.0164729	-2.88738	TAF7L	Xq22.1	X
0.238715	5.4105	4.70897	2.83927e-06	2.73906e-05	4.13569	TAF9B	Xq13.1-q21.1	X
0.113053	4.38638	3.18484	0.00149293	0.0055104	-1.69474	TBC1D25	Xp11.23	X
0.265264	0.214874	3.74017	0.000194296	0.000972961	0.176527	TBCAP1	Xp21.1	X
0.168887	5.77881	2.37758	0.017613	0.0417116	-3.88882	TBL1X	Xp22.3	X
0.260363	5.32934	2.92169	0.00355935	0.0115591	-2.4788	TCEAL3	Xq22.2	X
0.256178	7.14873	3.05884	0.00228087	0.0079588	-2.07844	TCEAL4	Xq22.2	X
0.217695	5.57439	4.00229	6.73448e-05	0.000416775	1.16113	TCEAL8	Xq22.1	X
0.145998	2.46498	3.0322	0.00249009	0.00855237	-2.15761	TCEANC	Xp22.2	X
0.0963086	6.05377	2.77923	0.00555047	0.0163506	-2.87554	TFE3	Xp11.22	X	transcription factor binding to IGHM enhancer 3	7030	X:49028731-49043486	1	Yes	11.23	yes		papillary renal, alveolar soft part sarcoma, renal			E	Dom	oncogene, fusion	T	SFPQ, ASPSCR1, PRCC, NONO, CLTC			7030,ENSG00000068323.16,P19532,TFE3,TFEA,bHLHe33	X	49028731	49043486
0.118724	6.34002	2.63521	0.00853816	0.0235338	-3.25679	THOC2	Xq25-q26.3	X
0.33857	5.29803	5.25316	1.82523e-07	3.07013e-06	6.74027	TIMM17B	Xp11.23	X
0.27434	2.90101	6.17156	9.79575e-10	3.21301e-08	11.7419	TIMM8A	Xq22	X
0.214711	3.88649	5.08951	4.28397e-07	5.73527e-06	5.92858	TMEM185A	Xq28	X
0.252042	3.766	4.00244	6.73021e-05	0.000416775	1.16172	TMEM187	Xq28	X
0.356533	-2.31283	3.65003	0.000275716	0.00128276	-0.147106	TMEM31	Xq22.2	X
0.628973	0.0733777	4.31499	1.75387e-05	0.000129274	2.42004	TMSB15A	Xq21.33-q22.3	X
0.19191	4.27023	4.1309	3.9142e-05	0.000267471	1.66782	TRAPPC2	Xp22	X
0.196888	4.56812	4.19027	3.03142e-05	0.000211554	1.90699	TRMT2B	Xq22.1	X
0.315894	5.77252	5.6762	1.80155e-08	4.07522e-07	8.9506	TSR2	Xp11.22	X
0.190913	5.24331	3.72052	0.000209833	0.00101963	0.105317	TXLNG	Xp22.2	X
0.201188	8.84887	5.01864	6.15289e-07	7.76211e-06	5.58464	UBA1	Xp11.23	X
0.266653	6.29026	7.16836	1.46908e-12	3.21239e-10	18.0075	UBE2A	Xq24	X
0.249049	5.87191	5.1743	2.76161e-07	4.21306e-06	6.3461	UBL4A	Xq28	X
0.175115	6.0938	4.30108	1.86556e-05	0.000135979	2.36209	UBQLN2	Xp11.21	X
0.193922	3.97091	4.39605	1.21973e-05	9.52551e-05	2.76127	UPRT	Xq13.3	X
0.143956	6.13779	2.82902	0.00476197	0.0147351	-2.73908	USP11	Xp11.23	X
0.231627	2.63525	4.74369	2.4021e-06	2.42427e-05	4.29379	USP27X	Xp11.23	X
0.197746	7.65284	3.49249	0.000499381	0.0021674	-0.694262	USP9X	Xp11.4	X
0.194329	4.96023	4.82858	1.58898e-06	1.68124e-05	4.68492	UTP14A	Xq26.1	X
0.188803	5.50036	3.73052	0.000201787	0.00100282	0.141503	UXT	Xp11.23-p11.22	X
0.300179	5.78435	6.11544	1.37711e-09	4.30183e-08	11.4148	VAMP7	Xq28 and Yq12	X
0.280015	5.63161	6.2204	7.26633e-10	2.5088e-08	12.0288	VBP1	Xq28	X
0.250432	5.76741	5.89406	5.13999e-09	1.30141e-07	10.1514	VMA21	Xq28	X
0.105388	5.31241	2.4165	0.0158479	0.0387918	-3.79745	WDR45	Xp11.23	X
0.202193	6.46527	4.04855	5.54982e-05	0.000353465	1.34162	YIPF6	Xq13.1	X
0.202946	0.42581	2.80352	0.00515218	0.0156474	-2.80927	YY2	Xp22.2-p22.1	X
0.207079	5.63446	3.65204	0.0002736	0.00128201	-0.139991	ZBTB33	Xq23	X
0.31364	6.39135	5.89346	5.15803e-09	1.30141e-07	10.1481	ZDHHC9	Xq26.1	X
0.115172	5.72654	2.67477	0.00759955	0.0213047	-3.15404	ZMYM3	Xq13.1	X	zinc finger MYM-type containing 3	9203	X:71239624-71254140	2		13.1	yes		CRC, breast cancer			E		TSG	F				9203,DXS6673E,ENSG00000147130.14,KIAA0385,MYM,Q14202,ZMYM3,ZNF198L2,ZNF261	X	71239624	71254140
0.139681	4.79551	2.36439	0.0182493	0.0430631	-3.91946	ZNF275	Xq28	X
0.12047	3.00367	2.57488	0.0101696	0.0271189	-3.41053	ZNF449	Xq26.3	X
0.148875	1.7478	2.52343	0.0117751	0.0302396	-3.53889	ZNF674-AS1	Xp11.23	X
0.115326	4.14763	2.54084	0.0112081	0.0290614	-3.49573	ZNF75D	Xq26	X
0.171168	4.56614	2.7673	0.00575611	0.0166976	-2.90788	ZXDB	Xp11.1	X

## Sheet: S. Table 2 TAB#2
Xa-Amp	Yu et al 66 XCU genes		33 Overlapping genes
ABCD1	1110012L19Rik		Abcd1
AIFM1	Abcd1		Apoo
AMER1	Amot		Apool
AP1S2	Apoo		Brcc3
APEX2	Apool		Ccdc22
APLN	Brcc3		Cox7b
APOO	C430049B03Rik		Eif1ax
APOOL	Capn6		Gdi1
ARAF	Ccdc22		Hsd17b10
ATG4A	Cox7b		Idh3g
ATP11C	Dcaf12l1		Ldoc1
ATP6AP1	Eda2r		Mcts1
ATP6AP2	Efnb1		Morf4l2
BCAP31	Eif1ax		Naa10
BEX3	Fgf13		Ndufa1
BEX4	Flna		Ndufb11
BRCC3	Fmr1nb		Nsdhl
C1GALT1C1	Gdi1		Ocrl
CA5BP1	Hmgn5		Pdha1
CASK	Hsd17b10		Pgk1
CCDC120	Idh3g		Phf6
CCDC22	Igbp1		Pir
CDK16	Klf8		Plac1
CDKL5	Ldoc1		Plp2
CENPI	Mageb16		Praf2
CETN2	Mbnl3		Psmd10
CLCN5	Mcts1		Rbbp7
CNGA2	Med12		Slc25a5
COX7B	Morf4l2		Uba1
CSTF2	Mpp1		Ube2a
CTPS2	Msn		Ubqln2
CUL4B	Naa10		Vbp1
DHRSX	Ndufa1		Vma21
DKC1	Ndufb11
DLG3	Nsdhl
DLG3-AS1	Nxf7
DRP2	Ocrl
EBP	Pdha1
EIF1AX	Pgk1
EIF2S3	Phf6
EIF4A1P10	Pir
ELK1	Plac1
EMD	Plp2
ENOX2	Praf2
ERCC6L	Prickle3
FAM104B	Psmd10
FAM120C	Rbbp7
FAM199X	Renbp
FAM3A	Rnf128
FAM50A	Sept6
FANCB	Slc25a5
FGD1	Slc6a14
FMR1	Slc7a3
FTSJ1	Slc9a6
FUNDC1	Srpk3
FUNDC2	Ssr4
G6PD	Trap1a
GABRA3	Tsix
GAPDHP65	Uba1
GDI1	Ube2a
GEMIN8	Ubqln2
GK	Vbp1
GPKOW	Vma21
GPR143	Xist
GRIPAP1	Xlr3b
GRPR	Zfp275
HCCS
HDAC6
HDAC8
HMGB3
HNRNPH2
HPRT1
HSD17B10
HSPA8P1
HSPB1P2
HTATSF1
HUWE1
IDH3G
IKBKG
IL13RA1
IRAK1
JADE3
KDM5C
KIF4A
KRT18P11
KRT8P8
LAGE3
LAMP2
LAS1L
LDOC1
LINC01278
MAGEA3
MAGEA6
MAGEC2
MAGED2
MAGEH1
MAGIX
MAGT1
MBTPS2
MCTS1
MED14
MID1IP1
MID2
MMGT1
MORC4
MORF4L2
MOSPD1
MTMR1
NAA10
NDUFA1
NDUFB11
NKAP
NKRF
NONO
NOX1
NSDHL
NUP62CL
NXT2
OCRL
OTUD5
PABPC1P3
PBDC1
PDHA1
PDK3
PDZD11
PGK1
PHEX
PHF6
PHF8
PHKA1
PHKA2
PIN4
PIR
PLAC1
PLP2
PLXNA3
POLA1
PORCN
PPEF1
PPP2R3B
PQBP1
PRAF2
PRDX4
PRPS2
PSMD10
PUDP
RAB41
RAB9A
RAB9B
RAP2C
RBBP7
RBM10
RBM3
RBM41
RBMX
RBMX2
REPS2
RIBC1
RLIM
RNF113A
RP2
RPL36A
RPL39
RRAGB
S100G
SCML2
SHROOM2
SLC25A14
SLC25A43
SLC25A5
SLC25A5-AS1
SLC25A6
SLC35A2
SLC6A8
SMC1A
SMS
SNX12
SPIN4
SUV39H1
SYAP1
TAF7L
TAF9B
TBC1D25
TBCAP1
TBL1X
TCEAL3
TCEAL4
TCEAL8
TCEANC
TFE3
THOC2
TIMM17B
TIMM8A
TMEM185A
TMEM187
TMEM31
TMSB15A
TRAPPC2
TRMT2B
TSR2
TXLNG
UBA1
UBE2A
UBL4A
UBQLN2
UPRT
USP11
USP27X
USP9X
UTP14A
UXT
VAMP7
VBP1
VMA21
WDR45
YIPF6
YY2
ZBTB33
ZDHHC9
ZMYM3
ZNF275
ZNF449
ZNF674-AS1
ZNF75D
ZXDB

## Sheet: S. Table 2 TAB#3
X-linked Genes that Interact with p53 as identified using the STRING Database (Version 10.5)*	Xa Amp			Xa Amp 35 String overlaps
AGTR2	ABCD1			AIFM1
AIFM1	AIFM1			APEX2
APEX2	AMER1			ARAF
AR	AP1S2			BRCC3
ARAF	APEX2			CDK16
ARX	APLN			CUL4B
ATP7A	APOO			DKC1
ATRX	APOOL			HCCS
BMX	ARAF			HDAC6
BRCC3	ATG4A			HDAC8
BTK	ATP11C			HPRT1
CD40LG	ATP6AP1			HUWE1
CDK16	ATP6AP2			IKBKG
CITED1	BCAP31			IRAK1
CTAG1B	BEX3			MAGEA3
CUL4B	BEX4			MAGEC2
CXCR3	BRCC3			MAGED2
CYBB	C1GALT1C1			MAGEH1
DCX	CA5BP1			NKRF
DDX3X	CASK			NOX1
DDX53	CCDC120			OTUD5
DKC1	CCDC22			PGK1
EDA	CDK16			PLAC1
EDA2R	CDKL5			POLA1
EFNB1	CENPI			PPEF1
ELF4	CETN2			PSMD10
FGF13	CLCN5			SUV39H1
FIGF	CNGA2			TAF9B
FLNA	COX7B			UBA1
FOXO4	CSTF2			UBE2A
FOXP3	CTPS2			UBQLN2
GATA1	CUL4B			USP11
GNL3L	DHRSX			UTP14A
GPC3	DKC1			YY2
HCCS	DLG3			ZBTB33
HDAC6	DLG3-AS1
HDAC8	DRP2
HPRT1	EBP
HUWE1	EIF1AX
IKBKG	EIF2S3
IL2RG	EIF4A1P10
IRAK1	ELK1
KDM6A	EMD
MAGEA1	ENOX2
MAGEA2	ERCC6L
MAGEA2B	FAM104B
MAGEA3	FAM120C
MAGEA4	FAM199X
MAGEC2	FAM3A
MAGED2	FAM50A
MAGED4	FANCB
MAGEE1	FGD1
MAGEH1	FMR1
MECP2	FTSJ1
MED12	FUNDC1
MSN	FUNDC2
NKRF	G6PD
NOX1	GABRA3
NR0B1	GAPDHP65
OTUD5	GDI1
PAK3	GEMIN8
PDZD4	GK
PGK1	GPKOW
PLAC1	GPR143
PLP1	GRIPAP1
POLA1	GRPR
PPEF1	HCCS
PSMD10	HDAC6
RNF128	HDAC8
RPS6KA3	HMGB3
SAT1	HNRNPH2
2006-09-01	HPRT1
SMARCA1	HSD17B10
SSX2B	HSPA8P1
STAG2	HSPB1P2
SUV39H1	HTATSF1
SYP	HUWE1
TAF1	IDH3G
TAF9B	IKBKG
TIMP1	IL13RA1
TREX2	IRAK1
TSC22D3	JADE3
UBA1	KDM5C
UBE2A	KIF4A
UBQLN2	KRT18P11
USP11	KRT8P8
UTP14A	LAGE3
XIAP	LAMP2
YY2	LAS1L
ZBTB33	LDOC1
	LINC01278
	MAGEA3
	MAGEA6
	MAGEC2
	MAGED2
	MAGEH1
	MAGIX
	MAGT1
	MBTPS2
	MCTS1
	MED14
	MID1IP1
	MID2
	MMGT1
	MORC4
	MORF4L2
	MOSPD1
	MTMR1
	NAA10
	NDUFA1
	NDUFB11
	NKAP
	NKRF
	NONO
	NOX1
	NSDHL
	NUP62CL
	NXT2
	OCRL
	OTUD5
	PABPC1P3
	PBDC1
	PDHA1
	PDK3
	PDZD11
	PGK1
	PHEX
	PHF6
	PHF8
	PHKA1
	PHKA2
	PIN4
	PIR
	PLAC1
	PLP2
	PLXNA3
	POLA1
	PORCN
	PPEF1
	PPP2R3B
	PQBP1
	PRAF2
	PRDX4
	PRPS2
	PSMD10
	PUDP
	RAB41
	RAB9A
	RAB9B
	RAP2C
	RBBP7
	RBM10
	RBM3
	RBM41
	RBMX
	RBMX2
	REPS2
	RIBC1
	RLIM
	RNF113A
	RP2
	RPL36A
	RPL39
	RRAGB
	S100G
	SCML2
	SHROOM2
	SLC25A14
	SLC25A43
	SLC25A5
	SLC25A5-AS1
	SLC25A6
	SLC35A2
	SLC6A8
	SMC1A
	SMS
	SNX12
	SPIN4
	SUV39H1
	SYAP1
	TAF7L
	TAF9B
	TBC1D25
	TBCAP1
	TBL1X
	TCEAL3
	TCEAL4
	TCEAL8
	TCEANC
	TFE3
	THOC2
	TIMM17B
	TIMM8A
	TMEM185A
	TMEM187
	TMEM31
	TMSB15A
	TRAPPC2
	TRMT2B
	TSR2
	TXLNG
	UBA1
	UBE2A
	UBL4A
	UBQLN2
	UPRT
	USP11
	USP27X
	USP9X
	UTP14A
	UXT
	VAMP7
	VBP1
	VMA21
	WDR45
	YIPF6
	YY2
	ZBTB33
	ZDHHC9
	ZMYM3
	ZNF275
	ZNF449
	ZNF674-AS1
	ZNF75D
	ZXDB
