# Supplementary material for: Establishing the Link between X-Chromosome Aberrations and TP53 Status, with Breast Cancer Patient Outcomes
Source: Cells. 2023 Sep 11;12(18):2245. doi: 10.3390/cells12182245 (PMC10526523; doi:10.3390/cells12182245)
Supplement: Supplementary file 1 [file cells-12-02245-s001.zip › Table S3.csv]

logFC	AveExpr	t	P.Value	adj.P.Val	B	symbol	Chromosome	Chrm	Name	Entrez_GeneId	Genome_Location	Tier	Hallmark	Chr_Band	Somatic	Germline	Tumour_Types(Somatic)	Tumour_Types(Germline)	Cancer_Syndrome	Tissue_Type	Molecular_Genetics	Role_in_Cancer	Mutation_Types	Translocation_Partner	Other_Germline_Mut	Other_Syndrome	Synonyms	chr	start	end
-0.724096141643734	2.78191803582418	-5.22072176047687	3.50244454442629e-07	7.65867873714549e-05	6.29304841784818	INTS6L	Xq26	X
-1.29515397894435	1.92218705601957	-4.84540504204122	2.10612346138647e-06	0.000276323398133905	4.61733815340283	COL4A6	Xq22	X
-0.57327084436515	3.35614165095652	-4.74529744876269	3.3396971925326e-06	0.000365140226383564	4.18801370847924	SLC9A6	Xq26.3	X
-0.788411963447819	-0.489449425421477	-4.64726069411944	5.20758605433497e-06	0.000441518644286542	3.77491695026579	GPR82	Xp11.4	X
-0.62444523841185	2.10269955734298	-4.63982815340755	5.38437371081149e-06	0.000441518644286542	3.74389710067534	GAB3	Xq28	X
-0.889482477861741	0.694911743438205	-4.28593385534812	2.51381524177805e-05	0.00135517409642114	2.31638133027065	PAK3	Xq22.3	X
-0.658626162579422	2.75629383929322	-4.23646698082344	3.09411427165251e-05	0.00144981354443146	2.12466888233764	GPRASP1	Xq22.1	X
-0.7148360291578	5.52061739427658	-4.12290234931544	4.94862192669855e-05	0.0021641973226095	1.69192097387597	SMARCA1	Xq25	X
-0.401410591443331	4.82442300605865	-4.02126965686476	7.46919408595397e-05	0.00288223018846224	1.3134298823269	TSPYL2	Xp11	X
-0.791606944252239	-0.0820650246503236	-4.00582317652659	7.94578218332172e-05	0.00289579617347725	1.25663735221875	MIR222HG	Xp11.3	X
-0.409477847925675	8.10355284251706	-3.83832241030815	0.000153513968517191	0.00401266072393735	0.653287430505109	MSN	Xq11.1	X	moesin	4478	X:65667670-65741931	1		12	yes		ALCL			L	Dom	fusion	T	ALK			4478,ENSG00000147065.16,MSN,P26038	X	65667670	65741931
-0.671068412440239	3.42311058986199	-3.81036530658496	0.00017097706566018	0.00401266072393735	0.554827474084596	DMD	Xp21.2	X
-0.680766946519713	5.44181491330983	-3.80288100390423	0.000175961500387506	0.00401266072393735	0.528578626744968	CYBB	Xp21.1	X
-1.00784184418003	-1.62695697814926	-3.80077453209422	0.000177388964930157	0.00401266072393735	0.521199188309807	SLC7A3	Xq12	X
-0.873488682090157	-0.632486115893413	-3.77155764584239	0.000198351844484302	0.00433729366605673	0.419224684733226	TENM1	Xq25	X
-0.522284103452178	5.1506968454542	-3.72354927391565	0.000237956918966706	0.00487811683881747	0.253200723760879	RPS6KA3	Xp22.2-p22.1	X
-0.562801673442833	-1.21725709064154	-3.69184031006783	0.000268086797498677	0.00524173434840454	0.144595423321674	LANCL3	Xp21.1	X
-0.388346015097892	5.22129344540466	-3.6439680102135	0.000320462208159056	0.00600637738720974	-0.0177799414691329	SH3KBP1	Xp22.1-p21.3	X
-0.501653360857801	0.404533492403815	-3.55968493600675	0.000436780867952696	0.00709718946593917	-0.298984434051827	ZC3H12B	Xq12	X
-0.507086272493831	3.50445587830103	-3.50255085618545	0.000537035182156796	0.00786386973455642	-0.486203178931706	CLIC2	Xq28	X
-0.754524333817404	0.860585526975898	-3.49788259592481	0.000546114828324234	0.00786386973455642	-0.501378227068986	TLR8	Xp22	X
-0.4644438561766	3.66477617123669	-3.48709472462054	0.000567649920916467	0.00786386973455642	-0.536375537424312	SHROOM4	Xp11.22	X
-0.521828099509714	2.91891290838501	-3.48330348039328	0.000575405102528519	0.00786386973455642	-0.548651406461486	CSF2RA	Xp22.32 and Yp11.3	X
-0.576881260270842	4.01983249250215	-3.46601787014314	0.000612037287719697	0.0081938053213086	-0.604466771089529	DOCK11	Xq24	X
-0.503363394945602	2.06248242022447	-3.32809258801992	0.000992760603629593	0.0108541825996835	-1.04070625191583	EDA2R	Xq11.1	X
-0.482901773774744	2.86503828575234	-3.2741505924404	0.00119440905576	0.0128447924685009	-1.20688423282436	GPR34	Xp11.4	X
-0.371686830486477	1.67315085344638	-3.26849388148219	0.00121762737695142	0.0128832832141957	-1.22416562459574	KCND1	Xp11.23	X
-0.271993683125818	4.10026943758562	-3.25727529813048	0.00126491960073562	0.0130252837617993	-1.25835704183756	MTM1	Xq28	X
-0.536656581463245	-1.19923700878955	-3.24573368214343	0.00131534852917486	0.0132400545617062	-1.29341963365492	MTMR8	Xq11.2	X
-0.486167294651926	3.04115393573145	-3.23754283036759	0.00135226167017426	0.0132400545617062	-1.31823305534085	BTK	Xq21.33-q22	X	Bruton agammaglobulinemia tyrosine kinase	695	X:101349447-101390796	1	Yes	22.1	yes		CLL, mantle cell lymphoma, WM			L	Dom	oncogene, TSG	Mis		yes	agammaglobulinemia	695,AGMX1,ATK,BTK,ENSG00000010671.15,IMD1,PSCTK1,Q06187,XLA	X	101349447	101390796
-0.606311995042381	2.58424370150626	-3.22698597122854	0.00140125500973191	0.0133220766142628	-1.3501285510918	P2RY8	Xp22.33 and Yp11.3	X	purinergic receptor P2Y, G-protein coupled, 8	286530	X:1462572-1537107	1		22.33	yes		B-ALL, Down syndrome associated ALL			L	Dom	oncogene, fusion	T	CRLF2			286530,ENSG00000182162.10,P2RY8,P2Y8,Q86VZ1	X	1462572	1537107
-0.4482977559967	4.52274902313532	-3.20971584704506	0.00148496532822441	0.0137202430326086	-1.40209902405656	PIM2	Xp11.23	X
-0.923146907437386	0.119209753458485	-3.17183546736715	0.00168505000813827	0.014951284413531	-1.51518638009612	GRIA3	Xq25	X
-0.327647589725718	4.12027240789714	-3.15540363621561	0.0017793663473404	0.0149585097043233	-1.56385441517398	MPP1	Xq28	X
-0.81175649457718	-0.951892441857878	-3.13639073280995	0.00189457544309796	0.0149585097043233	-1.61987419337203	GPR174	Xq13.3	X
-0.563880613087633	1.29699461258993	-3.13597156171349	0.00189719133175073	0.0149585097043233	-1.62110569926477	TMEM255A	Xq24	X
-0.460489749819167	3.31966437448748	-3.13523368996493	0.00190180421531793	0.0149585097043233	-1.62327316182149	GPM6B	Xp22.2	X
-0.457642885862429	-2.57291584602171	-3.13494346763562	0.00190362140716434	0.0149585097043233	-1.62412554600758	ZNF157	Xp11.2	X
-0.732120558296332	1.15378462832475	-3.13476090191004	0.00190476534162436	0.0149585097043233	-1.62466170473351	NHSL2	Xq13.1	X
-0.484643474553118	3.26608097713761	-3.11170283261543	0.00205445491902816	0.0158431973932725	-1.69214523742283	WAS	Xp11.4-p11.21	X	Wiskott-Aldrich syndrome	7454	X:48683779-48691427	1	Yes	11.23		yes		lymphoma	Wiskott-Aldrich syndrome	L	Rec/X	oncogene	Mis, N, F, S				7454,ENSG00000015285.10,IMD2,P42768,THC,WAS,WASP,WASPA	X	48683779	48691427
-0.523989865514299	3.53555231760547	-3.10836452037776	0.00207700453631317	0.0158431973932725	-1.70187700281538	ARMCX4	Xq22	X
-0.522415572668595	2.88678552965783	-3.05124158785486	0.0024999767812196	0.0182220529831118	-1.86689252002936	MID1	Xp22	X
-0.497755046857785	0.77823092903203	-3.03401230877563	0.00264231345577507	0.0186492446941818	-1.91610382520137	TCEAL7	Xq22.1	X
-0.611684943197186	1.22977107135213	-3.01229765348298	0.00283230741220113	0.0197658900255738	-1.97775587530106	SMIM10L2A	Xq26.3	X
-0.559779894999031	4.49948463114588	-2.95543207876449	0.00339080703127752	0.0225944696174466	-2.13724531922677	RAI2	Xp22	X
-0.522928200907194	2.98924944921589	-2.95365009520263	0.00340983611604758	0.0225944696174466	-2.14219721678636	TLR7	Xp22.3	X
-1.18407259310262	0.841101675241438	-2.94690835629219	0.00348271619101654	0.0228466182130685	-2.16090629867846	IGSF1	Xq25	X
-0.750143169541006	-0.0364170123978062	-2.9365241230755	0.0035977646562307	0.0233676595493796	-2.18964531164413	CD40LG	Xq26	X
-0.523773642336566	3.8954550245888	-2.92089919488156	0.0037774355498617	0.0238269011606661	-2.23270899282255	SASH3	Xq26	X
-0.522152689688961	7.18701869686458	-2.90229138159382	0.00400208365954994	0.024767612081743	-2.28371248196453	AR	Xq12	X	Androgen Receptor	367	X:67544036-67730619	1	Yes	12	yes	yes	prostate			E	Dom	oncogene	Mis		yes	Androgen insensitivity, Hypospadias 1, X-linked, Spinal and bulbar muscular atrophy of Kennedy	367,AIS,AR,DHTR,ENSG00000169083.16,HUMARA,NR3C4,P10275,SBMA,SMAX1	X	67544036	67730619
-0.350206630526512	3.30225294784069	-2.87544796499801	0.00434768303726468	0.0261796110539885	-2.35675005704212	STARD8	Xq13.1	X
-0.495573861543642	1.24590575288677	-2.87527721732796	0.00434996586110479	0.0261796110539885	-2.35721259854752	ZDHHC15	Xq13.3	X
-0.614514578330642	0.259101779110787	-2.86331086850515	0.00451269859306704	0.0267531728609409	-2.38956412636655	RGN	Xp11.3	X
-0.584146809293976	4.16616623173122	-2.85711982293506	0.0045990509140661	0.0267589171353656	-2.40625206424381	ITM2A	Xq13.3-q21.2	X
-0.582259923382004	-2.83736257704247	-2.85638590864452	0.0046093866406956	0.0267589171353656	-2.40822807412733	LINC01281	Xp11.4	X
-0.374054964952316	-1.59429910662388	-2.83610155945727	0.00490355514827624	0.0271947523551327	-2.46265307014836	MAP2K4P1	Xq13.2	X
-0.435899117787464	-2.68865177594549	-2.83371772192944	0.00493922469362583	0.0271947523551327	-2.46902517041141	KCNE5	Xq22.3	X
-0.593596395659991	-1.68766396889906	-2.83313100658895	0.00494803986566296	0.0271947523551327	-2.47059271191353	LINC00892	Xq26.3	X
-0.287345119513693	6.63175803078957	-2.82652422711344	0.00504829639293077	0.0273692763120875	-2.48822309774992	ATRX	Xq21.1	X	alpha thalassemia/mental retardation syndrome X-linked	546	X:77504878-77786269	1	Yes	21.1	yes		pancreatic neuroendocrine tumours, paediatric GBM			E	Rec	TSG	Mis, F, N		yes	ATR-X (alpha thalassemia/mental retardation) syndrome	546,ATRX,ENSG00000085224.21,JMS,MRX52,P46100,RAD54,XH2,XNP	X	77504878	77786269
-0.260995032764328	1.29238616877397	-2.78816013177135	0.00566783946759514	0.0302284771605074	-2.58983190594224	SPRY3	Xq28 and Yq12	X
-0.407699734120443	2.98949252410616	-2.77335308476062	0.00592485208942664	0.0306793711048809	-2.62869854246548	TRO	Xp11.22-p11.21	X
-1.2499707611699	-1.65408101832564	-2.76206846258754	0.00612776542777307	0.031404797817337	-2.65818803814504	ARHGAP36	Xq26.1	X
-0.458624406156071	-2.8462136108568	-2.75753153755262	0.0062111041067917	0.0315851495663206	-2.67001212980405	FGF13-AS1	Xq26.3	X
-0.800554413087473	-1.22193097653596	-2.75165929548446	0.00632049424098344	0.0317311741193947	-2.68528904181192	VGLL1	Xq26.3	X
-0.530934189812778	-0.335573603385183	-2.74824310835177	0.00638493137768308	0.0317311741193947	-2.69416225169308	CNKSR2	Xp22.12	X
-0.701072220422661	4.08975773001308	-2.73096570832353	0.0067200171634031	0.0331453478134769	-2.73887895723211	MAOA	Xp11.4-p11.3	X
-0.555306220832968	4.60117226602231	-2.7105404127718	0.0071366022401868	0.0346786005152781	-2.79139878781726	TMEM47	Xp11.4	X
-0.481460947152888	0.0596672953520986	-2.69963319114867	0.00736848128939258	0.0352826549331499	-2.81929179838799	LONRF3	Xq24	X
-0.555426960203576	-0.539447777270454	-2.66019626576452	0.00826465515668824	0.0384511615800531	-2.91925437502263	PRRG3	Xq28	X
-0.448774861808145	0.918815183675242	-2.64255587017057	0.00869636464107774	0.0398938126192098	-2.96351665386258	LRCH2	Xq24	X
-0.37253906545193	4.86681990881042	-2.63400982130273	0.00891270894864358	0.040602340766043	-2.98485940142865	ACSL4	Xq22.3-q23	X
-0.24754258409783	6.11795990727459	-2.63051867685898	0.00900246951984266	0.040728413827702	-2.99355923692664	WWC3	Xp22.32	X
-0.209684246025324	6.81946423204757	-2.59859877406193	0.00986155502941751	0.0435015854835766	-3.07259435411979	IDS	Xq27.3-q28	X
-0.328882600170028	-2.40535568473535	-2.59791642654539	0.00988069548331236	0.0435015854835766	-3.07427386437865	MAP3K15	Xp22.12	X
-0.84909772295992	0.853553645310842	-2.59172954402475	0.0100557676069082	0.0439772236675452	-3.08948293327767	CAPN6	Xq23	X
-0.690168969136316	0.606233249699663	-2.58330993304739	0.0102984808431922	0.0447404200869808	-3.11012525507035	P2RY10	Xq21.1	X
-0.693549553802044	-0.685093242383148	-2.57534145465973	0.0105330039572501	0.0452459815290537	-3.12960267277311	PTCHD1	Xp22.13	X
-0.703387084100461	-0.99179711150247	-2.56129958410686	0.010957922700748	0.0460794698185301	-3.16378593626832	TCEAL2	Xq22.1-q22.3	X
-0.334328618485773	2.87948733283205	-2.54775897186824	0.0113821107381308	0.0469908499565415	-3.19658038121272	MAP7D3	Xq26.3	X
-0.638566254110949	-1.8653697409829	-2.53262370724072	0.0118735494220558	0.0486815526304287	-3.23304092224621	DCAF12L2	Xq25	X	DDB1 and CUL4 associated factor 12 like 2	340578	X:126163499-126166097	2		25	yes		CRC			E			Mis				340578,DCAF12L2,ENSG00000198354.6,Q5VW00,WDR40C	X	126163499	126166097
