# Supplementary material for: Establishing the Link between X-Chromosome Aberrations and TP53 Status, with Breast Cancer Patient Outcomes
Source: Cells. 2023 Sep 11;12(18):2245. doi: 10.3390/cells12182245 (PMC10526523; doi:10.3390/cells12182245)
Supplement: Supplementary file 1 [file cells-12-02245-s001.zip › Table S4.csv]

logFC	AveExpr	t	P.Value	adj.P.Val	B	symbol	Chromosome	Chrm	Name	Entrez_GeneId	Genome_Location	Tier	Hallmark	Chr_Band	Somatic	Germline	Tumour_Types(Somatic)	Tumour_Types(Germline)	Cancer_Syndrome	Tissue_Type	Molecular_Genetics	Role_in_Cancer	Mutation_Types	Translocation_Partner	Other_Germline_Mut	Other_Syndrome	Synonyms	chr	start	end
1.89380081111566	-3.70853619764912	5.99078075273265	6.47034740956114e-09	4.2445479006721e-06	10.0485837986305	MAGEA3	Xq28	X
1.47056464531546	-3.50808920494474	5.79060419948864	1.89845153005316e-08	6.22692101857437e-06	9.03046652688185	CSAG1	Xq28	X
1.73449288352524	-3.5255148327644	5.70123100925524	3.04337859928031e-08	6.65485453709295e-06	8.58458165953985	MAGEC2	Xq27	X
1.46080454701161	-3.81324209076245	4.98479827459078	1.09477256806625e-06	0.000179542701162864	5.21203941007322	MAGEA6	Xq28	X
1.32855316989956	-3.35600879838047	4.35339306944323	1.88795790625792e-05	0.00247700077301039	2.55399390868372	GABRA3	Xq28	X
