# Supplementary material for: Establishing the Link between X-Chromosome Aberrations and TP53 Status, with Breast Cancer Patient Outcomes
Source: Cells. 2023 Sep 11;12(18):2245. doi: 10.3390/cells12182245 (PMC10526523; doi:10.3390/cells12182245)
Supplement: Supplementary file 1 [file cells-12-02245-s001.zip › Table S5.xlsx]

## Sheet: Overlap of Xi-Del & Hi Meth
Hi Meth	Xi Del		Hi Meth overlap	Xi Del-overlap
ACSL4	AKAP17A		ARHGAP36	ARHGAP36
AR	ARHGAP36		ARMCX4	ARMCX4
ARHGAP36	ARMCX4		COL4A6	COL4A6
ARMCX4	ARR3		DMD	DMD
ATRX	ARSD		EDA2R	EDA2R
BTK	ASMTL		GAB3	GAB3
CAPN6	ASMTL-AS1		GPRASP1	GPRASP1
CD40LG	AVPR2		GRIA3	GRIA3
CLIC2	BMX		INTS6L	INTS6L
CNKSR2	CACNA1F		ITM2A	ITM2A
COL4A6	CCDC160		LANCL3	LANCL3
CSF2RA	CD99P1		MAOA	MAOA
CYBB	CFP		MAP2K4P1	MAP2K4P1
DCAF12L2	CHST7		MIR222HG	MIR222HG
DMD	COL4A6		PAK3	PAK3
DOCK11	DHRSX		PRRG3	PRRG3
EDA2R	DMD		RAI2	RAI2
FGF13-AS1	EDA2R		RGN	RGN
GAB3	EEF1B2P3		SHROOM4	SHROOM4
GPM6B	GAB3		SLC7A3	SLC7A3
GPR174	GPRASP1		SMIM10L2A	SMIM10L2A
GPR34	GRIA3		STARD8	STARD8
GPR82	GTPBP6		TCEAL2	TCEAL2
GPRASP1	IL3RA		TCEAL7	TCEAL7
GRIA3	INTS6L		TENM1	TENM1
IDS	ITM2A		TMEM255A	TMEM255A
IGSF1	JPX		TMEM47	TMEM47
INTS6L	KDM5C
ITM2A	KDM6A		27/80 genes	27/63
KCND1	KIAA1210		0.34	0.43
KCNE5	LANCL3
LANCL3	LINC00106
LINC00892	LINC00685
LINC01281	MAOA
LONRF3	MAP2K4P1
LRCH2	MIR222HG
MAOA	PAK3
MAP2K4P1	PLCXD1
MAP3K15	PNPLA4
MAP7D3	PPP2R3B
MID1	PRRG3
MIR222HG	PUDP
MPP1	RAI2
MSN	RGN
MTM1	RPS4X
MTMR8	SHROOM4
NHSL2	SLC25A6
P2RY10	SLC7A3
P2RY8	SMIM10L2A
PAK3	STARD8
PIM2	STS
PRRG3	TCEAL2
PTCHD1	TCEAL5
RAI2	TCEAL7
RGN	TENM1
RPS6KA3	TMEM255A
SASH3	TMEM47
SH3KBP1	TSIX
SHROOM4	TSPAN7
SLC7A3	XIST
SLC9A6	XPNPEP2
SMARCA1	ZBED1
SMIM10L2A	ZRSR2
SPRY3
STARD8
TCEAL2
TCEAL7
TENM1
TLR7
TLR8
TMEM255A
TMEM47
TRO
TSPYL2
VGLL1
WAS
WWC3
ZC3H12B
ZDHHC15
ZNF157

## Sheet: Overlap of Xa-Amp and Lo Meth
Xa Amp	Lo Meth		Lo Meth--overlap	Xa Amp--overlap
ABCD1	MAGEC2		GABRA3	GABRA3
AIFM1	MAGEA6		MAGEA3	MAGEA3
AMER1	MAGEA3		MAGEA6	MAGEA6
AP1S2	GABRA3		MAGEC2	MAGEC2
APEX2	CSAG1
APLN			4/5 genes	4/225
APOO			0.8	0.02
APOOL
ARAF
ATG4A
ATP11C
ATP6AP1
ATP6AP2
BCAP31
BEX3
BEX4
BRCC3
C1GALT1C1
CA5BP1
CASK
CCDC120
CCDC22
CDK16
CDKL5
CENPI
CETN2
CLCN5
CNGA2
COX7B
CSTF2
CTPS2
CUL4B
DHRSX
DKC1
DLG3
DLG3-AS1
DRP2
EBP
EIF1AX
EIF2S3
EIF4A1P10
ELK1
EMD
ENOX2
ERCC6L
FAM104B
FAM120C
FAM199X
FAM3A
FAM50A
FANCB
FGD1
FMR1
FTSJ1
FUNDC1
FUNDC2
G6PD
GABRA3
GAPDHP65
GDI1
GEMIN8
GK
GPKOW
GPR143
GRIPAP1
GRPR
HCCS
HDAC6
HDAC8
HMGB3
HNRNPH2
HPRT1
HSD17B10
HSPA8P1
HSPB1P2
HTATSF1
HUWE1
IDH3G
IKBKG
IL13RA1
IRAK1
JADE3
KDM5C
KIF4A
KRT18P11
KRT8P8
LAGE3
LAMP2
LAS1L
LDOC1
LINC01278
MAGEA3
MAGEA6
MAGEC2
MAGED2
MAGEH1
MAGIX
MAGT1
MBTPS2
MCTS1
MED14
MID1IP1
MID2
MMGT1
MORC4
MORF4L2
MOSPD1
MTMR1
NAA10
NDUFA1
NDUFB11
NKAP
NKRF
NONO
NOX1
NSDHL
NUP62CL
NXT2
OCRL
OTUD5
PABPC1P3
PBDC1
PDHA1
PDK3
PDZD11
PGK1
PHEX
PHF6
PHF8
PHKA1
PHKA2
PIN4
PIR
PLAC1
PLP2
PLXNA3
POLA1
PORCN
PPEF1
PPP2R3B
PQBP1
PRAF2
PRDX4
PRPS2
PSMD10
PUDP
RAB41
RAB9A
RAB9B
RAP2C
RBBP7
RBM10
RBM3
RBM41
RBMX
RBMX2
REPS2
RIBC1
RLIM
RNF113A
RP2
RPL36A
RPL39
RRAGB
S100G
SCML2
SHROOM2
SLC25A14
SLC25A43
SLC25A5
SLC25A5-AS1
SLC25A6
SLC35A2
SLC6A8
SMC1A
SMS
SNX12
SPIN4
SUV39H1
SYAP1
TAF7L
TAF9B
TBC1D25
TBCAP1
TBL1X
TCEAL3
TCEAL4
TCEAL8
TCEANC
TFE3
THOC2
TIMM17B
TIMM8A
TMEM185A
TMEM187
TMEM31
TMSB15A
TRAPPC2
TRMT2B
TSR2
TXLNG
UBA1
UBE2A
UBL4A
UBQLN2
UPRT
USP11
USP27X
USP9X
UTP14A
UXT
VAMP7
VBP1
VMA21
WDR45
YIPF6
YY2
ZBTB33
ZDHHC9
ZMYM3
ZNF275
ZNF449
ZNF674-AS1
ZNF75D
ZXDB
