# Supplementary figures and images for: Establishing the Link between X-Chromosome Aberrations and TP53 Status, with Breast Cancer Patient Outcomes
Source: MDPI journal article supplement (doi:10.3390/cells12182245), 2023-09-11

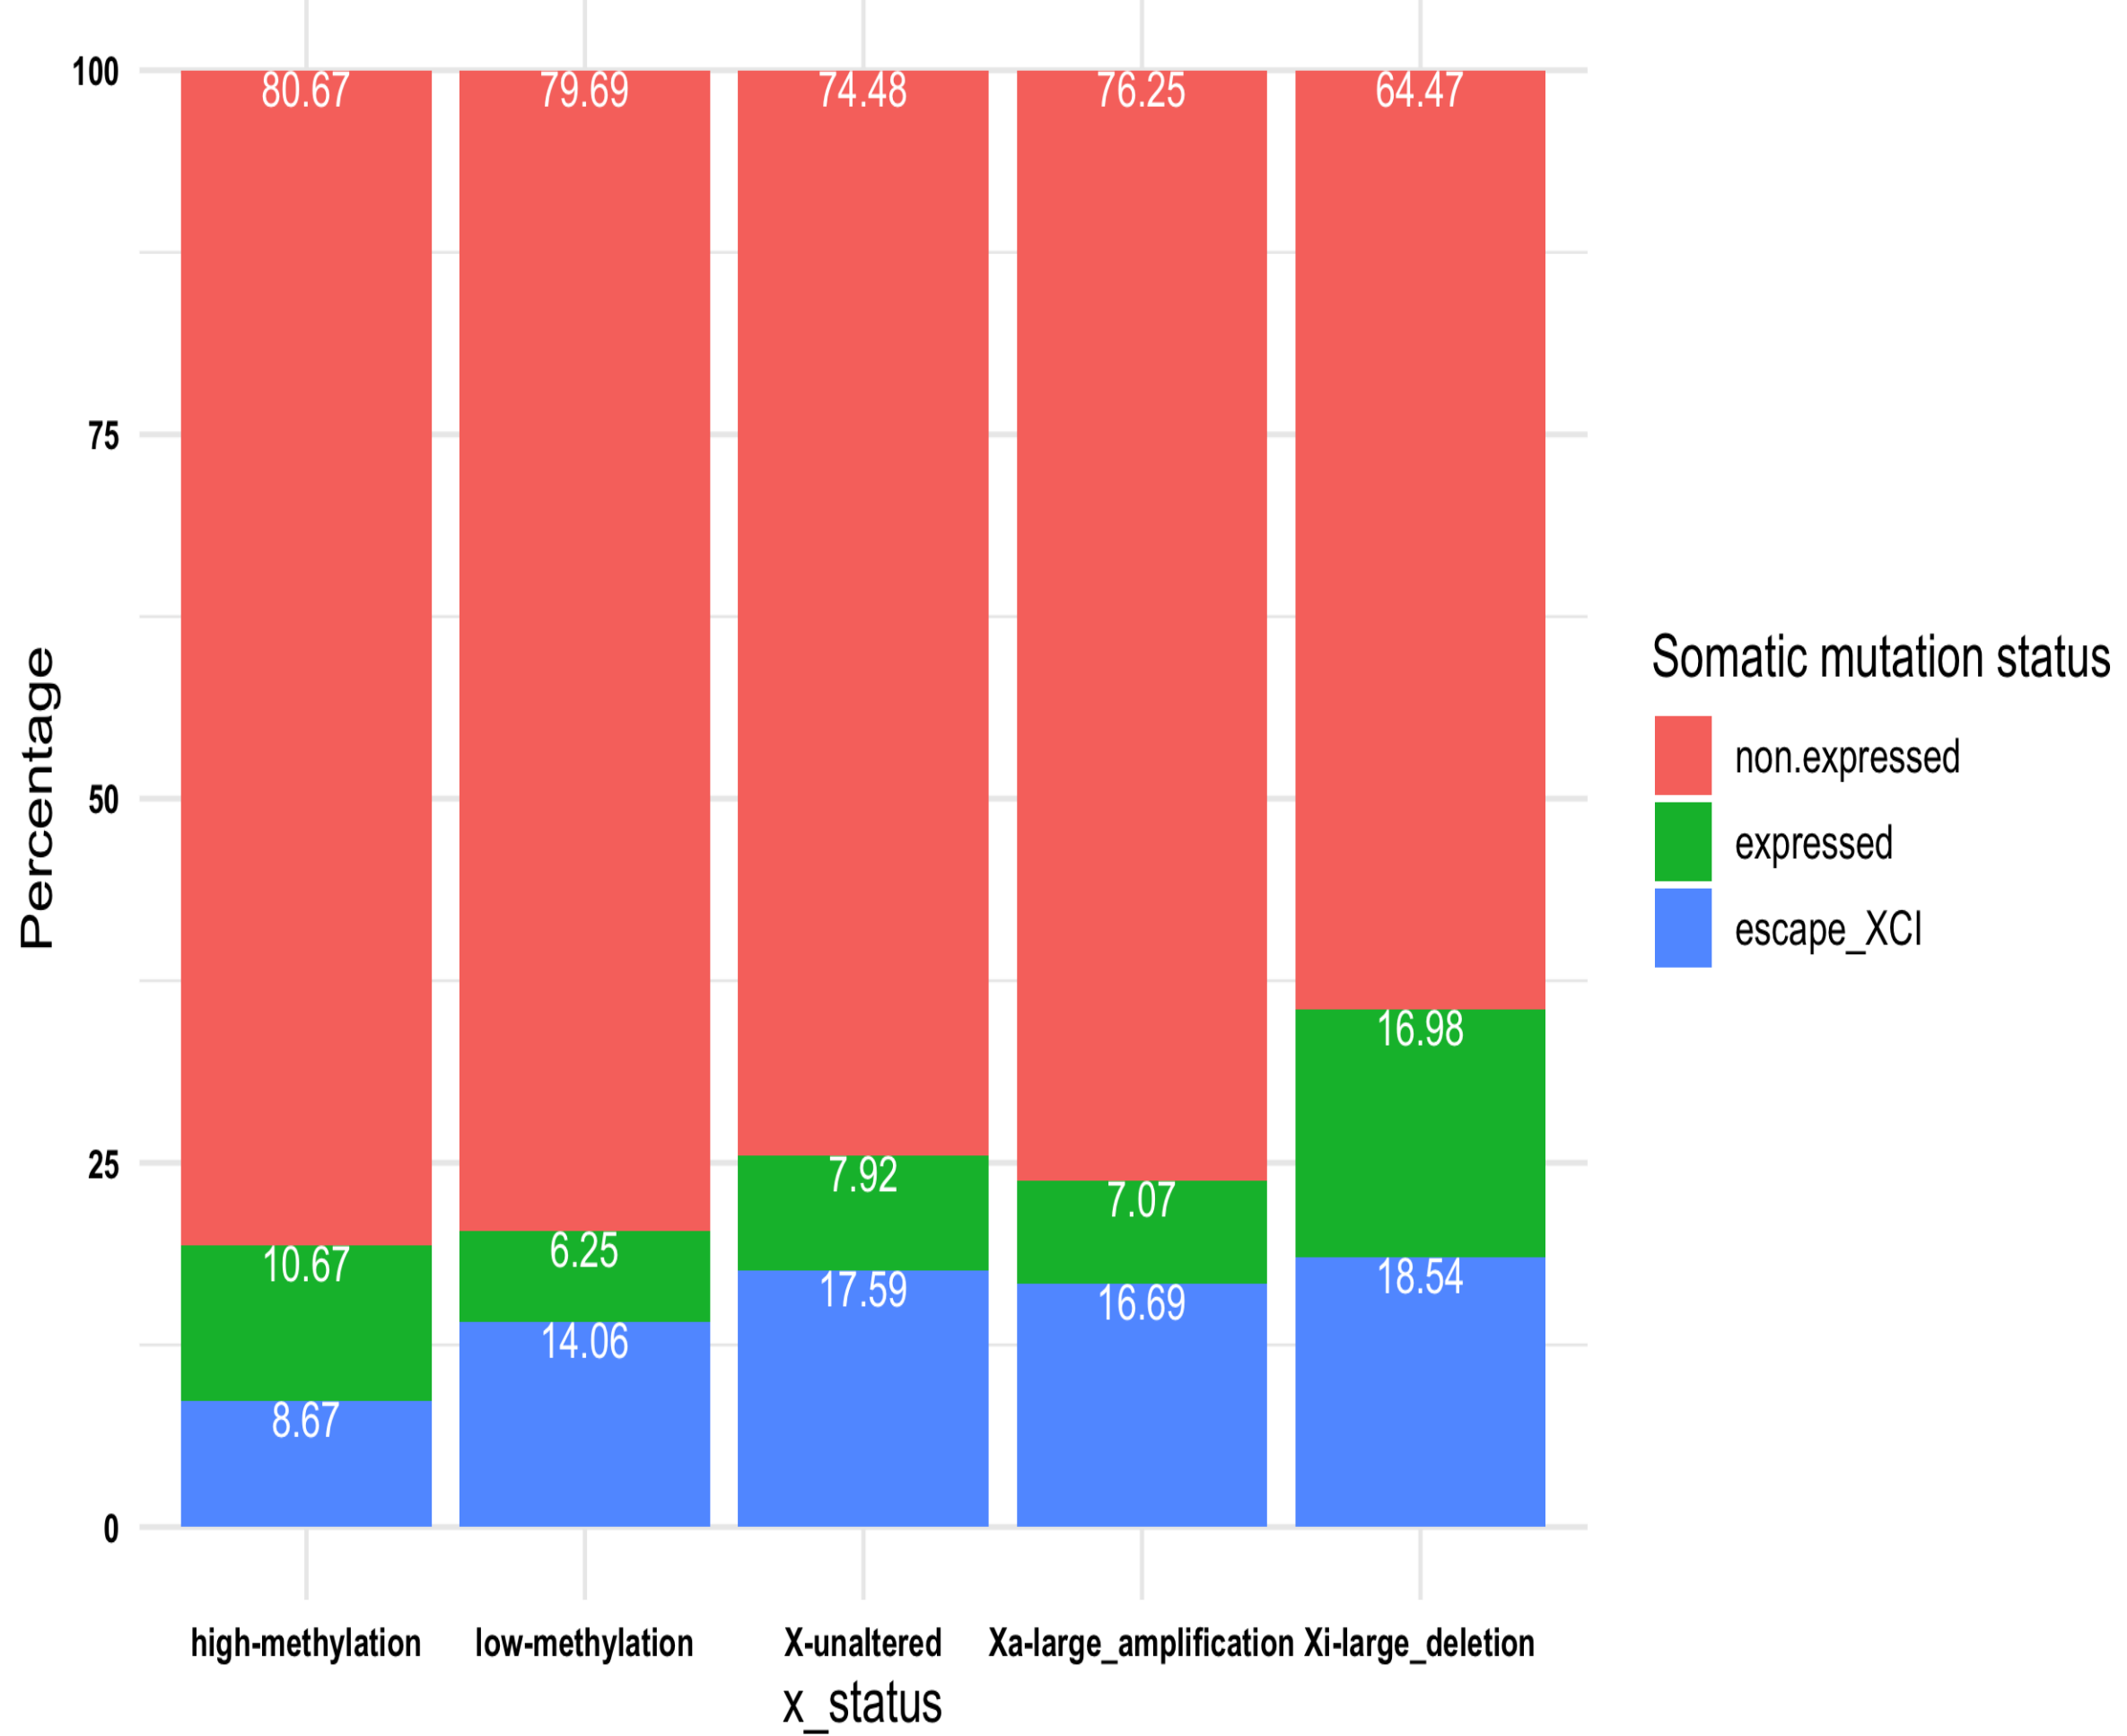

**Supplementary Figure S3**

Supplement: s1 [file s1]

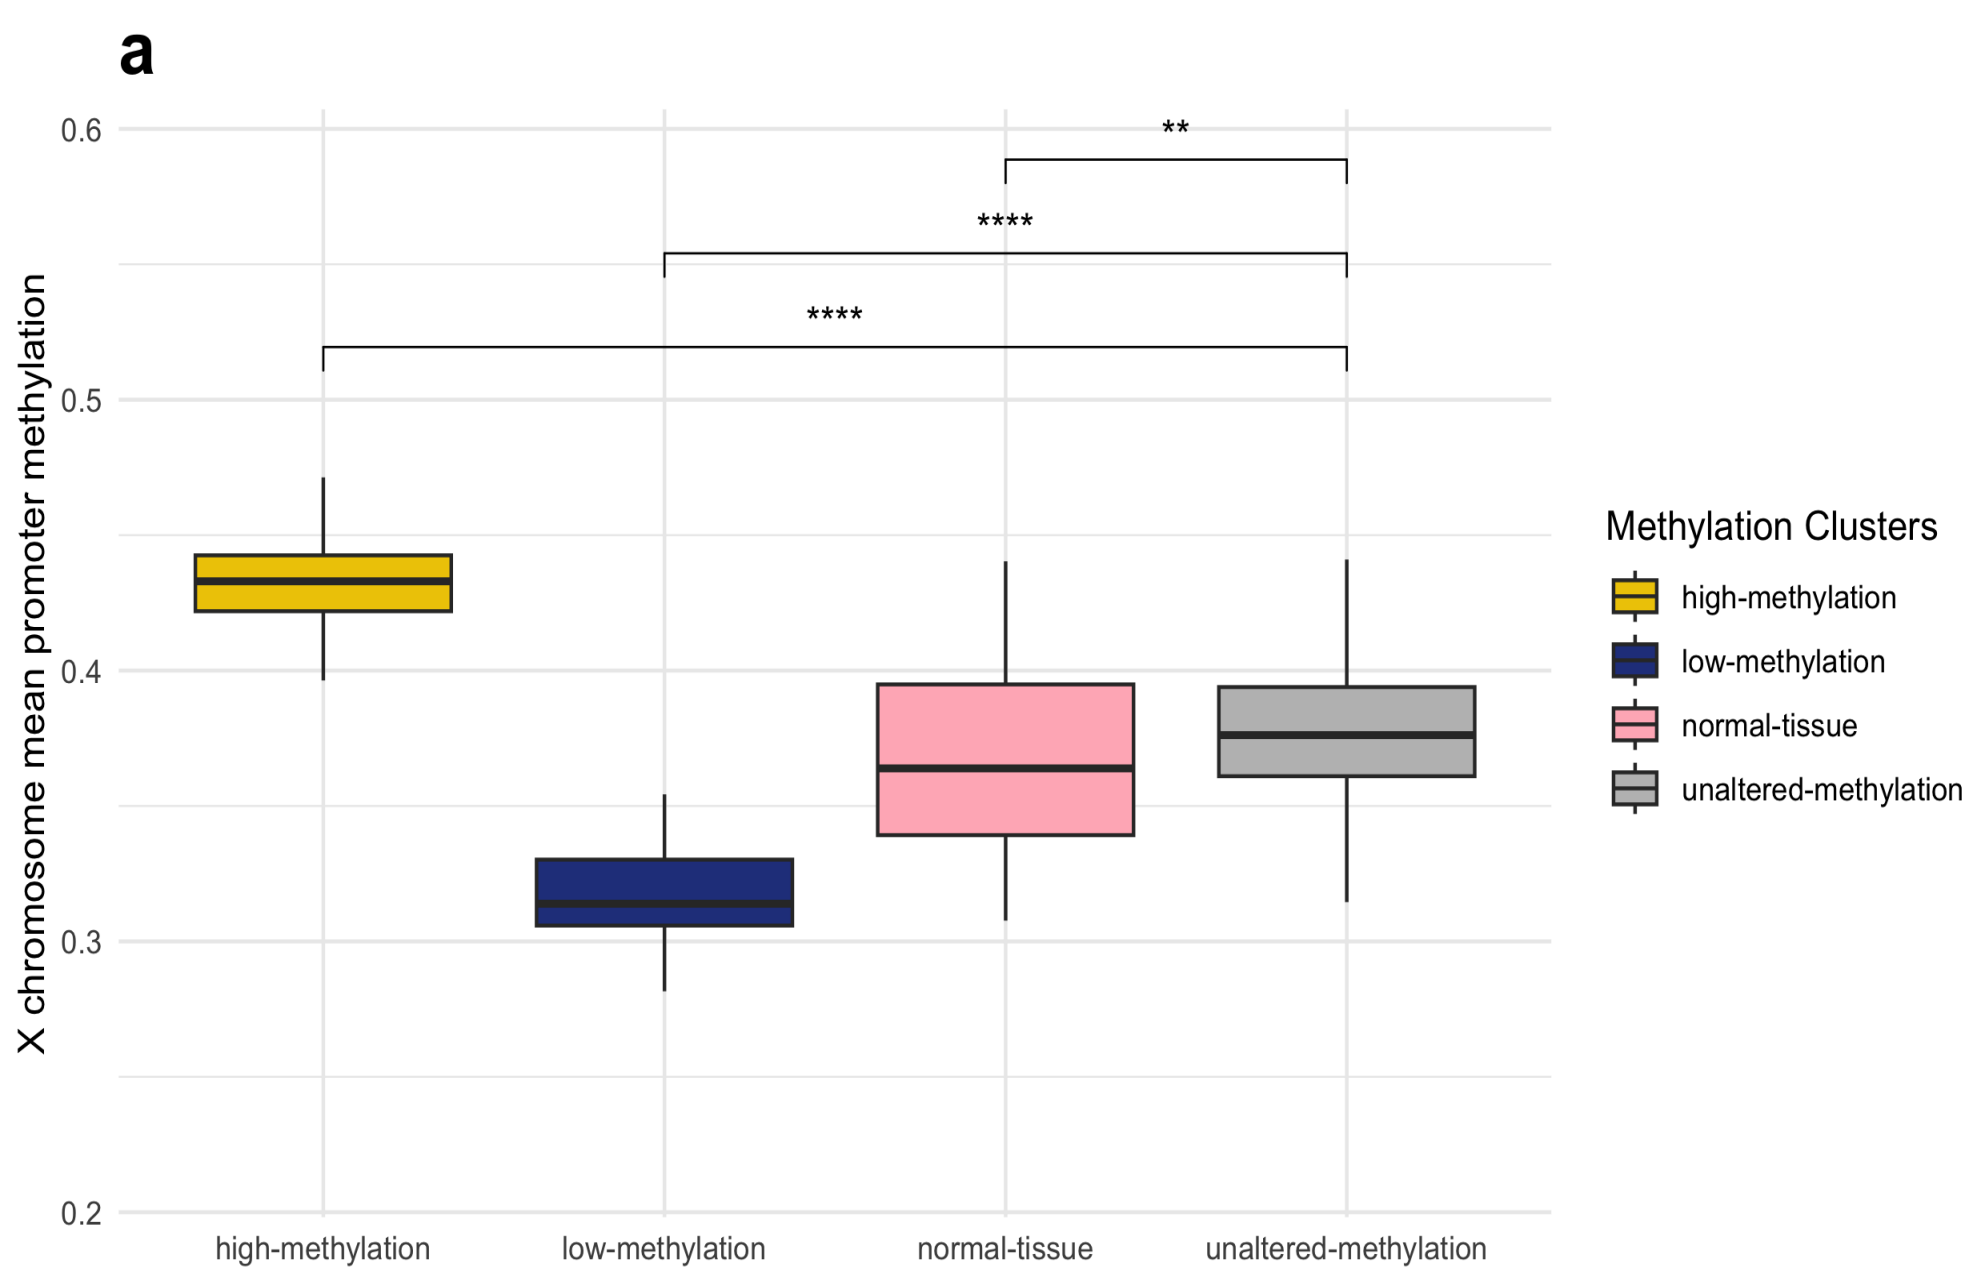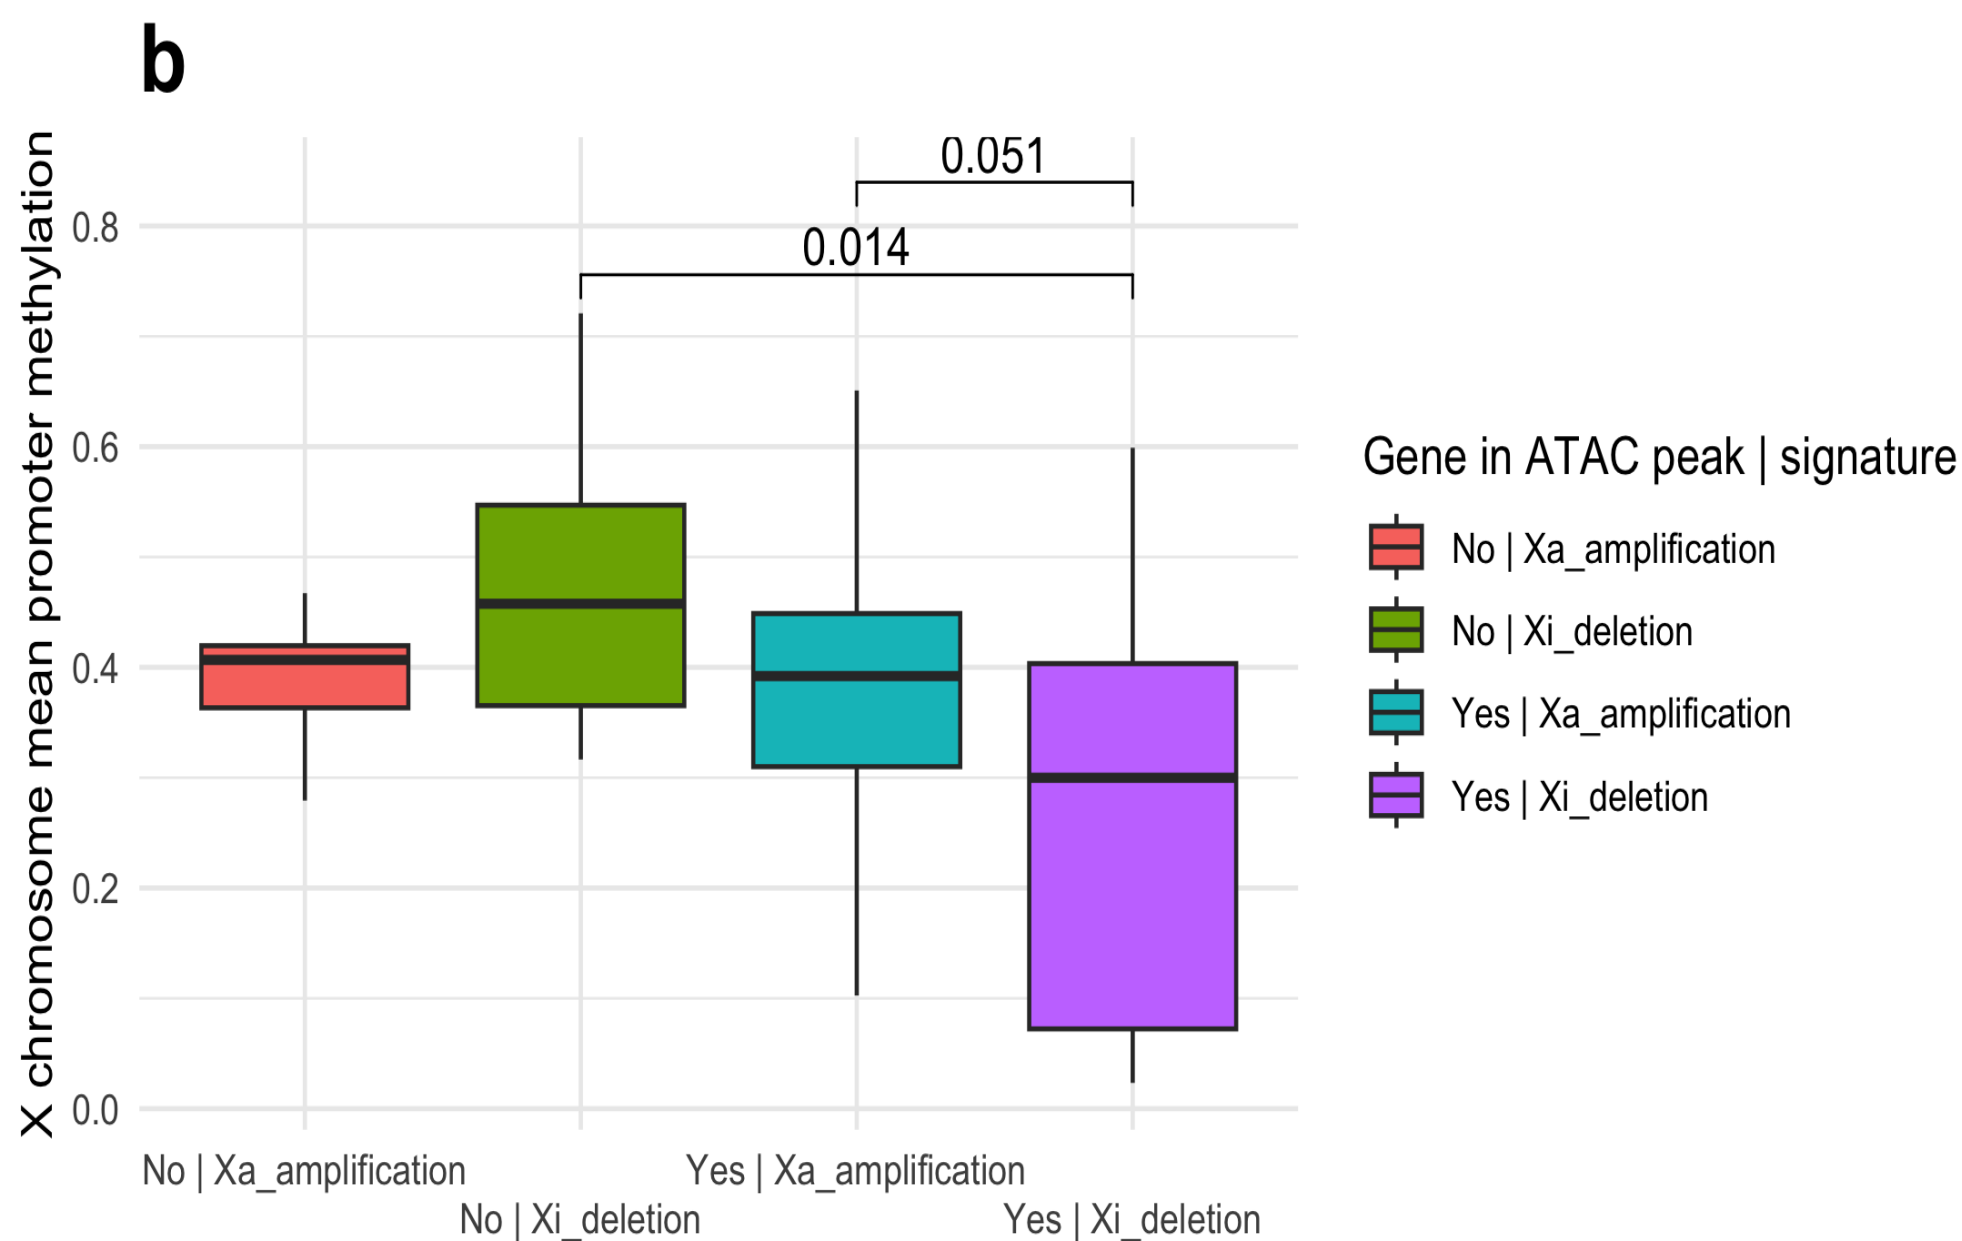

**Supplementary Figure S4**

Supplement: s1 [file s1]

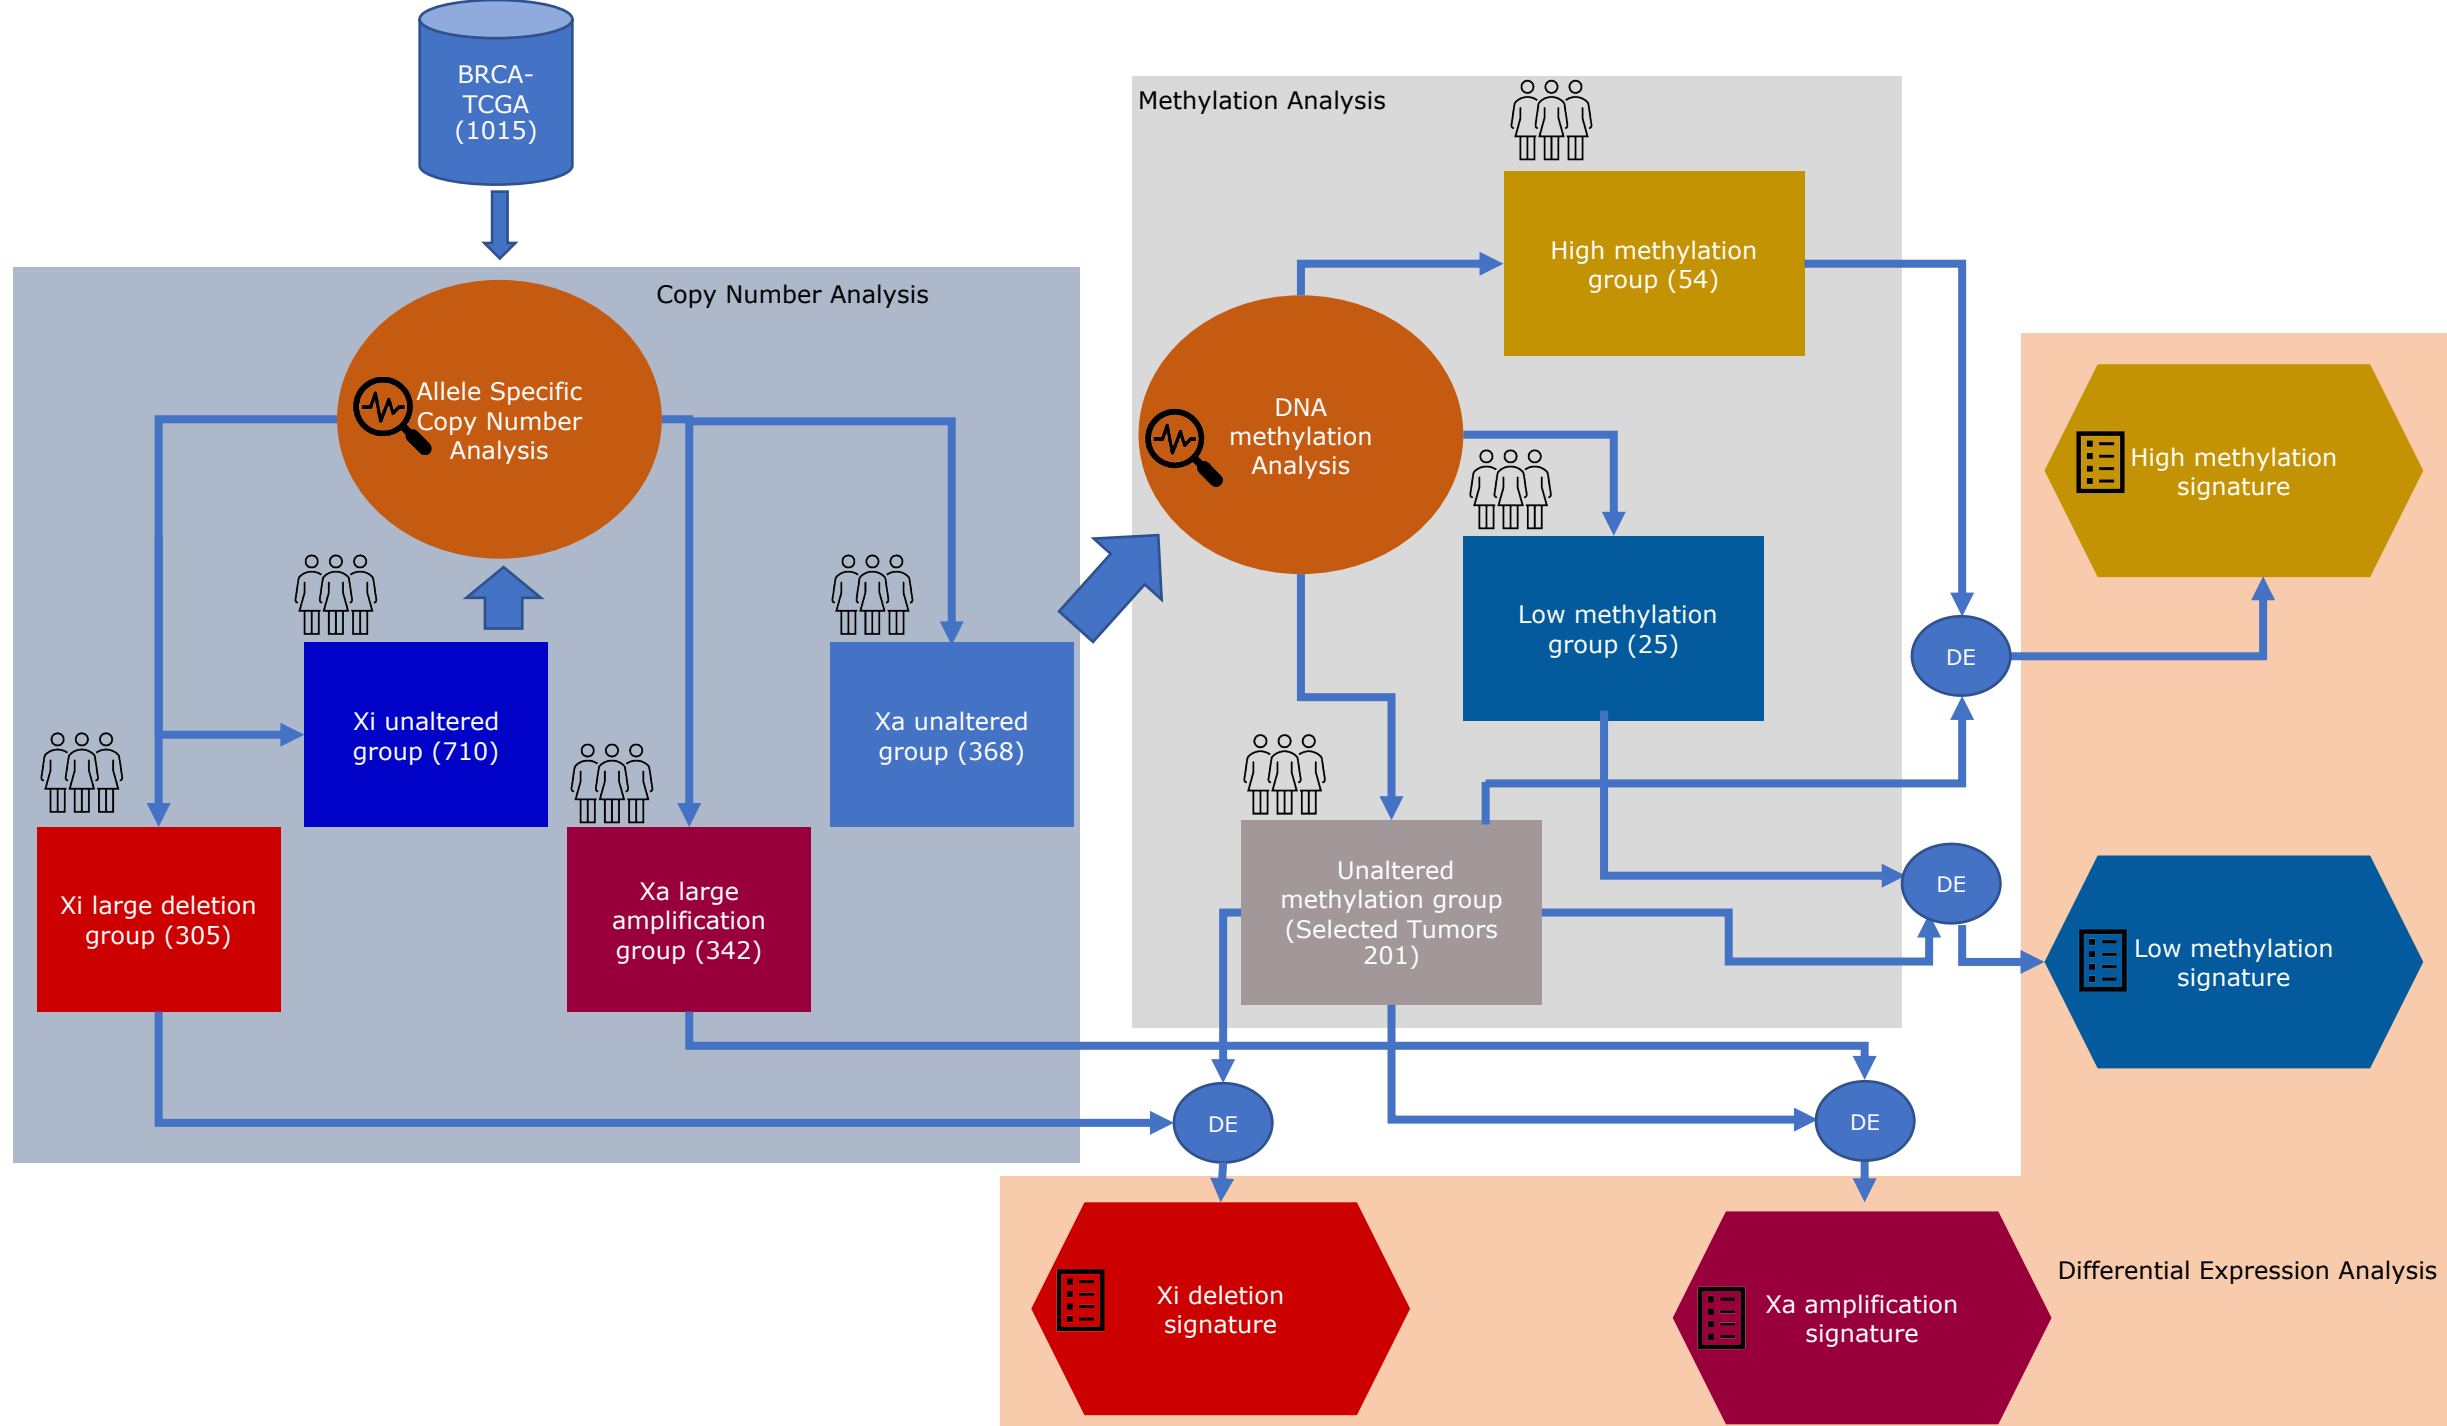

**Supplementary Diagram S1: Analysis pipeline of BRCA-TCGA samples.**

Supplement: s1 [file s1]
